# Supplementary material
Source: PubMed Central journal article supplement (PMC8941355)
Supplement: jama-e222518-s001.pdf [file jama-e222518-s001.pdf]

## Supplemental Online Content

Wang W, Zhang MJ, Inciardi RM, et al. Association of echocardiographic measures of left atrial function and size with incident dementia. *JAMA*. doi:10.1001/jama.2022.2518

- eTable 1.** Visit 1 Participant Characteristics According to Participant Follow-Up Status: The ARIC Study, 1987-1989
- eTable 2.** Baseline Participant Characteristics (Visit 5 Participants Missing LA Function Measures): The ARIC Study, 2011-2013
- eTable 3.** Baseline Participant Characteristics (Visit 5 Participants without Echocardiograms): The ARIC Study, 2011-2013
- eTable 4.** Baseline Participant Characteristics (Visit 5 Participants with Missing Covariates): The ARIC Study, 2011-2013
- eTable 5.** Association of Left Atrial Measures with Incident Dementia Stratified by Race: The ARIC Study, 2011-2019
- eTable 6.** Association of Left Atrial Measures with Incident Dementia Stratified by Sex: The ARIC Study, 2011-2019
- eTable 7.** Hazard Ratios for Dementia by Different Left Atrial Reservoir Strain Cutoffs: The ARIC Study, 2011-2019
- eTable 8.** Baseline Participant Characteristics (by Left Atrial Reservoir Strain <27% vs. ≥27%): The ARIC Study, 2011-2013
- eTable 9.** Association of Left Atrial Reservoir Strain (Binary Variable) with Incident Dementia: The ARIC Study, 2011-2019
- eTable 10.** Brain MRI Measures (2011-13) Among Participants with Left Atrial Reservoir Strain <27%, Stratified by Dementia
- eTable 11.** Hazard Ratios for Dementia Among Participants Without Incident Atrial Fibrillation or Stroke: The ARIC Study, 2011-2019 (n=3,466)
- eTable 12.** Hazard Ratios for Incident Dementia Among Participants Not Taking Anticoagulants: The ARIC Study, 2011-2019 (n=4,006)
- eTable 13.** Hazard Ratios for Incident Dementia Among Participants Without Valvular Heart Disease: The ARIC Study, 2011-2019 (n=3,973)
- eTable 14.** Competing Risk Subdistribution Hazard Models for Incident Dementia: The ARIC Study, 2011-2019 (n=4,096)
- eTable 15.** Hazard Ratios for Incident Dementia Among Participants with CRP Measures: the ARIC Study, 2011-2019 (n=4,057)
- eTable 16.** Association of Left Atrial Measures with Incident Dementia Using MICE: The ARIC Study, 2011-2019 (n=4,946)
- eFigure 1.** Directed Acyclic Graph
- eFigure 2.** Association of Left Atrial Measures with Incident Dementia: The ARIC Study, 2011-2019 (n=4,096)
- eFigure 3.** Restricted Cubic Splines Plotting Dementia Incidence by Left Atrial Measures: The ARIC Study, 2011-2019 (n=4,096)

This supplemental material has been provided by the authors to give readers additional information about their work.

**eTable 1. Visit 1 Participant Characteristics According to Participant Follow-Up Status: The ARIC Study, 1987-1989**

|                                                  | Attended visit 5 <sup>a</sup><br>(n=6,538) | Died before visit 5 was complete <sup>b</sup><br>(n=5,878) | Declined attending visit 5 <sup>c</sup><br>(n=3,376) |
|--------------------------------------------------|--------------------------------------------|------------------------------------------------------------|------------------------------------------------------|
| <b>Demographics</b>                              |                                            |                                                            |                                                      |
| Age, mean (SD), years                            | 52.1 (5.2)                                 | 56.8 (5.5)                                                 | 53.6 (5.6)                                           |
| Women, No. (%)                                   | 3845 (58.8%)                               | 2716 (46.2%)                                               | 2149 (63.7%)                                         |
| Men, No. (%)                                     | 2693 (41.2%)                               | 3162 (53.8%)                                               | 1227 (36.3%)                                         |
| Black race, No. (%)                              | 1543 (23.6%)                               | 1855 (31.6%)                                               | 868 (25.7%)                                          |
| White race, No. (%)                              | 4977 (76.1%)                               | 4010 (68.2%)                                               | 2491 (73.8%)                                         |
| Less than high school education, No. (%)         | 990 (15.1%)                                | 1992 (33.9%)                                               | 785 (23.3%)                                          |
| Current smokers, No. (%)                         | 1170 (17.9%)                               | 2182 (37.1%)                                               | 780 (23.1%)                                          |
| <b>Clinical Characteristics</b>                  |                                            |                                                            |                                                      |
| Body mass index, median (IQR), kg/m <sup>2</sup> | 26.4 (23.8-29.7)                           | 27.4 (24.0-30.5)                                           | 26.8 (24.0-30.5)                                     |
| Systolic blood pressure, median (IQR), mmHg      | 115.0 (105.0-126.0)                        | 124.0 (112.0-138.0)                                        | 118.0 (118.0-130.0)                                  |
| Antihypertensive medication use, No. (%)         | 1471 (22.5%)                               | 2406 (40.9%)                                               | 961 (28.5%)                                          |
| Diabetes, No. (%)                                | 386 (5.9%)                                 | 1206 (20.5%)                                               | 278 (8.2%)                                           |
| >1 APOE ε4 allele, No. (%)                       | 1830 (28.0%)                               | 1876 (31.9%)                                               | 958 (28.4%)                                          |
| Coronary heart disease, No. (%)                  | 124 (1.9%)                                 | 561 (9.5%)                                                 | 81 (2.4%)                                            |
| Heart failure, No. (%)                           | 168 (2.6%)                                 | 459 (7.8%)                                                 | 125 (3.7%)                                           |
| Anticoagulant medication use, No. (%)            | 14 (0.2%)                                  | 66 (1.1%)                                                  | 9 (0.3%)                                             |

<sup>a</sup> Numbers for missing data are 11 for education level, 4 for body mass index, and 1 for systolic blood pressure.

<sup>b</sup> Numbers for missing data are 11 for education level, 15 for body mass index, and 2 for systolic blood pressure.

<sup>c</sup> Numbers for missing data are 5 for education level and 6 for body mass index.

Abbreviations: ARIC = Atherosclerosis Risk in Communities; SD = standard deviation; IQR = interquartile range; APOE = apolipoprotein E

**eTable 2. Baseline Participant Characteristics (Visit 5 Participants Missing LA Function Measures): The ARIC Study, 2011-2013**

|                                                  | Analytic Study Population<br>(n=4,096) | Visit 5 Participants Missing LA Function Measures <sup>a</sup><br>(n=850) |
|--------------------------------------------------|----------------------------------------|---------------------------------------------------------------------------|
| <b>Demographics</b>                              |                                        |                                                                           |
| Age, mean (SD) years                             | 75.0 (5.0)                             | 75.2 (5.0)                                                                |
| Women, No. (%)                                   | 2443 (59.6%)                           | 495 (58.2%)                                                               |
| Men, No. (%)                                     | 1653 (40.4%)                           | 355 (41.8%)                                                               |
| Black race, No. (%)                              | 895 (21.9%)                            | 159 (18.7%)                                                               |
| White race, No. (%)                              | 3201 (78.1%)                           | 691 (81.3%)                                                               |
| Less than high school education, No. (%)         | 504 (12.3%)                            | 90 (10.6%)                                                                |
| Current smokers, No. (%)                         | 228 (5.6%)                             | 53 (6.2%)                                                                 |
| <b>Clinical Characteristics</b>                  |                                        |                                                                           |
| Body mass index, median (IQR), kg/m <sup>2</sup> | 27.7 (24.8-31.1)                       | 28.7 (24.9-32.7)                                                          |
| Systolic blood pressure, median (IQR), mmHg      | 129.0 (118.0-140.5)                    | 127.5 (117.0-140.0)                                                       |
| Antihypertensive medication use, No. (%)         | 2938 (71.7%)                           | 645 (75.6%)                                                               |
| Diabetes, No. (%)                                | 1187 (29.0%)                           | 288 (33.8%)                                                               |
| >1 APOE ε4 allele, No. (%)                       | 1119 (27.3%)                           | 220 (25.8%)                                                               |
| Coronary heart disease, No. (%)                  | 520 (12.7%)                            | 124 (14.5%)                                                               |
| Heart failure, No. (%)                           | 368 (9.0%)                             | 90 (10.6%)                                                                |
| Anticoagulant medication use, No. (%)            | 90 (2.2%)                              | 20 (2.3%)                                                                 |

<sup>a</sup> Numbers for missing data are 1 for education, 1 for systolic blood pressure, and 1 for body mass index.

Abbreviations: ARIC = Atherosclerosis Risk in Communities; SD = standard deviation; IQR = interquartile range; APOE = apolipoprotein E; LA = left atrial

**eTable 3. Baseline Participant Characteristics (Visit 5 Participants Without Echocardiograms): The ARIC Study, 2011-2013**

|                                                  | Analytic Study Population<br>(n=4,096) | Visit 5 Participants without Echocardiograms <sup>a</sup><br>(n=420) |
|--------------------------------------------------|----------------------------------------|----------------------------------------------------------------------|
| <b>Demographics</b>                              |                                        |                                                                      |
| Age, mean (SD), years                            | 75.0 (5.0)                             | 79.7 (5.5)                                                           |
| Women, No. (%)                                   | 2443 (59.6%)                           | 303 (72.1%)                                                          |
| Men, No. (%)                                     | 1653 (40.4%)                           | 117 (27.9%)                                                          |
| Black race, No. (%)                              | 895 (21.9%)                            | 211 (50.2%)                                                          |
| White race, No. (%)                              | 3201 (78.1%)                           | 209 (49.8%)                                                          |
| Less than high school education, No. (%)         | 504 (12.3%)                            | 157 (37.4%)                                                          |
| Current smokers, No. (%)                         | 228 (5.6%)                             | 14 (3.3%)                                                            |
| <b>Clinical Characteristics</b>                  |                                        |                                                                      |
| Body mass index, median (IQR), kg/m <sup>2</sup> | 27.7 (24.8-31.1)                       | 29.4 (25.6-35.3)                                                     |
| Systolic blood pressure, median (IQR), mmHg      | 129.0 (118.0-140.5)                    | 135.0 (122.0-151.0)                                                  |
| Antihypertensive medication use, No. (%)         | 2938 (71.7%)                           | 365 (86.9%)                                                          |
| Diabetes, No. (%)                                | 1187 (29.0%)                           | 181 (43.1%)                                                          |
| >1 APOE ε4 allele, No. (%)                       | 1119 (27.3%)                           | 143 (34.0%)                                                          |
| Coronary heart disease, No. (%)                  | 520 (12.7%)                            | 98 (23.3%)                                                           |
| Heart failure, No. (%)                           | 368 (9.0%)                             | 132 (31.4%)                                                          |
| Anticoagulant medication use, No. (%)            | 90 (2.2%)                              | 63 (15.0%)                                                           |

<sup>a</sup> Numbers for missing data are 1 for education level, 15 for systolic blood pressure, and 235 for body mass index.

Abbreviations: ARIC = Atherosclerosis Risk in Communities; SD = standard deviation; IQR = interquartile range; APOE = apolipoprotein E

**eTable 4. Baseline Participant Characteristics (Visit 5 Participants with Missing Covariates):  
The ARIC Study, 2011-2013**

|                                                          | Analytic Study Population<br>(n=4,096) | Visit 5 Participants with<br>Missing Covariates <sup>a</sup><br>(n=228) |
|----------------------------------------------------------|----------------------------------------|-------------------------------------------------------------------------|
| <b>Demographics</b>                                      |                                        |                                                                         |
| Age, mean (SD), years                                    | 75.0 (5.0)                             | 76.0 (4.9)                                                              |
| Women, No. (%)                                           | 2443 (59.6%)                           | 147 (64.5%)                                                             |
| Men, No. (%)                                             | 1653 (40.4%)                           | 81 (35.5%)                                                              |
| Black race, No. (%)                                      | 895 (21.9%)                            | 71 (31.1%)                                                              |
| White race, No. (%)                                      | 3201 (78.1%)                           | 157 (68.9%)                                                             |
| Less than high school education, No. (%)                 | 504 (12.3%)                            | 50 (21.9%)                                                              |
| Current smokers, No. (%)                                 | 228 (5.6%)                             | 19 (8.3%)                                                               |
| <b>Clinical Characteristics</b>                          |                                        |                                                                         |
| Body mass index, median (IQR), kg/m <sup>2</sup>         | 27.7 (24.8-31.1)                       | 30.1 (26.2-35.1)                                                        |
| Systolic blood pressure, median (IQR), mmHg              | 129.0 (118.0-140.5)                    | 127.0 (117.0-141.5)                                                     |
| Antihypertensive medication use, No. (%)                 | 2938 (71.7%)                           | 192 (84.2%)                                                             |
| Diabetes, No. (%)                                        | 1187 (29.0%)                           | 99 (43.4%)                                                              |
| >1 APOE ε4 allele, No. (%)                               | 1119 (27.3%)                           | 57 (25.0%)                                                              |
| Coronary heart disease, No. (%)                          | 520 (12.7%)                            | 30 (13.2%)                                                              |
| Heart failure, No. (%)                                   | 368 (9.0%)                             | 33 (14.5%)                                                              |
| Anticoagulant medication use, No. (%)                    | 90 (2.2%)                              | 4 (1.8%)                                                                |
| <b>Echocardiogram Measures</b>                           |                                        |                                                                         |
| LA reservoir strain, mean (SD), %                        | 32.8 (7.7)                             | 30.7 (7.8)                                                              |
| LA conduit strain, mean (SD), %                          | 14.9 (5.6)                             | 13.5 (5.4)                                                              |
| LA contractile strain, mean (SD), %                      | 18.0 (5.5)                             | 17.2 (6.1)                                                              |
| LA emptying fraction, mean (SD), %                       | 58.3 (9.3)                             | 56.5 (9.9)                                                              |
| LA passive emptying fraction, mean (SD), %               | 26.5 (10.4)                            | 25.3 (10.8)                                                             |
| LA active emptying fraction, mean (SD), %                | 43.1 (10.5)                            | 41.6 (11.3)                                                             |
| Maximal LA volume index, median (IQR), ml/m <sup>2</sup> | 32.3 (26.0-39.7)                       | 33.3 (27.0-40.3)                                                        |
| Minimal LA volume index, median (IQR), ml/m <sup>2</sup> | 13.0 (9.7-17.7)                        | 13.9 (10.2-19.9)                                                        |
| LV ejection fraction, median (IQR), %                    | 66.1 (62.4-69.5)                       | 63.3 (60.1-68.1)                                                        |
| LV mass index, median (IQR), %                           | 75.2 (65.4-87.3)                       | 77.4 (66.1-91.2)                                                        |

<sup>a</sup> Numbers for missing data are 9 for education level, 15 for systolic blood pressure, 18 for body mass index, 58 for LA reservoir strain, 58 for LA conduit strain, 58 for LA contractile strain, 80 for LA emptying fraction, 80 for LA passive emptying fraction, 80 for LA active emptying fraction, 89 for maximal LA volume index, 89 for minimal LA volume index, 156 for LV ejection fraction, 51 for LV mass index.

Abbreviations: ARIC = Atherosclerosis Risk in Communities; IQR = interquartile range; APOE = apolipoprotein E; LA = left atrial; LV = left ventricular

**eTable 5. Association of Left Atrial Measures with Incident Dementia Stratified by Race: The ARIC Study, 2011-2019<sup>a</sup>**

|                                        | Black Participants (n=895) |                                                                                                                                                                                                                                                                                                                                                               | White Participants (n=3201) |                                                                                                                                                                                                                                                                                                                                                               |
|----------------------------------------|----------------------------|---------------------------------------------------------------------------------------------------------------------------------------------------------------------------------------------------------------------------------------------------------------------------------------------------------------------------------------------------------------|-----------------------------|---------------------------------------------------------------------------------------------------------------------------------------------------------------------------------------------------------------------------------------------------------------------------------------------------------------------------------------------------------------|
|                                        | Incidence Rate (per 100PY) | Hazard Ratio (95% Confidence Interval)                                                                                                                                                                                                                                                                                                                        | Incidence Rate (per 100PY)  | Hazard Ratio (95% Confidence Interval)                                                                                                                                                                                                                                                                                                                        |
|                                        |                            | Adjusted for age, sex, APOE ε4, education, body mass index, smoking status, diabetes, systolic blood pressure, antihypertensive medications, coronary heart disease, heart failure, anticoagulant use, incident atrial fibrillation incident stroke, LAVImin (for LA function measures only), left ventricular ejection fraction, left ventricular mass index |                             | Adjusted for age, sex, APOE ε4, education, body mass index, smoking status, diabetes, systolic blood pressure, antihypertensive medications, coronary heart disease, heart failure, anticoagulant use, incident atrial fibrillation incident stroke, LAVImin (for LA function measures only), left ventricular ejection fraction, left ventricular mass index |
| <b>LA Reservoir Strain, %</b>          |                            |                                                                                                                                                                                                                                                                                                                                                               |                             |                                                                                                                                                                                                                                                                                                                                                               |
| <26.72                                 | 6.36                       | 2.47 (1.27, 4.80)                                                                                                                                                                                                                                                                                                                                             | 4.29                        | 1.91 (1.30, 2.82)                                                                                                                                                                                                                                                                                                                                             |
| 26.73 – 30.59                          | 3.20                       | 1.30 (0.70, 2.43)                                                                                                                                                                                                                                                                                                                                             | 1.72                        | 0.86 (0.59, 1.26)                                                                                                                                                                                                                                                                                                                                             |
| 30.60 – 34.41                          | 1.86                       | 0.97 (0.49, 1.92)                                                                                                                                                                                                                                                                                                                                             | 1.68                        | 0.96 (0.67, 1.37)                                                                                                                                                                                                                                                                                                                                             |
| 34.42 – 39.40                          | 1.75                       | 0.86 (0.42, 1.76)                                                                                                                                                                                                                                                                                                                                             | 1.40                        | 0.92 (0.64, 1.32)                                                                                                                                                                                                                                                                                                                                             |
| >39.41                                 | 1.88                       | Reference                                                                                                                                                                                                                                                                                                                                                     | 1.49                        | Reference                                                                                                                                                                                                                                                                                                                                                     |
| <b>LA Conduit Strain, %</b>            |                            |                                                                                                                                                                                                                                                                                                                                                               |                             |                                                                                                                                                                                                                                                                                                                                                               |
| <9.90                                  | 5.43                       | 1.68 (0.90, 3.13)                                                                                                                                                                                                                                                                                                                                             | 3.48                        | 1.40 (0.96, 2.04)                                                                                                                                                                                                                                                                                                                                             |
| 9.91 – 13.06                           | 3.31                       | 1.46 (0.79, 2.70)                                                                                                                                                                                                                                                                                                                                             | 2.32                        | 1.23 (0.85, 1.79)                                                                                                                                                                                                                                                                                                                                             |
| 13.07 – 15.89                          | 2.53                       | 1.13 (0.59, 2.17)                                                                                                                                                                                                                                                                                                                                             | 1.65                        | 1.06 (0.73, 1.55)                                                                                                                                                                                                                                                                                                                                             |
| 15.90 – 19.52                          | 2.17                       | 1.31 (0.67, 2.55)                                                                                                                                                                                                                                                                                                                                             | 1.68                        | 1.14 (0.79, 1.64)                                                                                                                                                                                                                                                                                                                                             |
| >19.53                                 | 1.65                       | Reference                                                                                                                                                                                                                                                                                                                                                     | 1.19                        | Reference                                                                                                                                                                                                                                                                                                                                                     |
| <b>LA Contractile Strain, %</b>        |                            |                                                                                                                                                                                                                                                                                                                                                               |                             |                                                                                                                                                                                                                                                                                                                                                               |
| ≤13.47                                 | 4.99                       | 1.92 (1.05, 3.53)                                                                                                                                                                                                                                                                                                                                             | 2.79                        | 1.43 (1.00, 2.04)                                                                                                                                                                                                                                                                                                                                             |
| 13.48 – 16.62                          | 2.32                       | 0.99 (0.54, 1.81)                                                                                                                                                                                                                                                                                                                                             | 2.09                        | 1.12 (0.80, 1.58)                                                                                                                                                                                                                                                                                                                                             |
| 16.63 – 19.17                          | 2.27                       | 1.04 (0.57, 1.92)                                                                                                                                                                                                                                                                                                                                             | 1.88                        | 1.08 (0.77, 1.52)                                                                                                                                                                                                                                                                                                                                             |
| 19.18 – 22.37                          | 3.13                       | 1.35 (0.76, 2.41)                                                                                                                                                                                                                                                                                                                                             | 1.72                        | 1.08 (0.77, 1.44)                                                                                                                                                                                                                                                                                                                                             |
| >22.38                                 | 2.65                       | Reference                                                                                                                                                                                                                                                                                                                                                     | 1.64                        | Reference                                                                                                                                                                                                                                                                                                                                                     |
| <b>LA Emptying Fraction, %</b>         |                            |                                                                                                                                                                                                                                                                                                                                                               |                             |                                                                                                                                                                                                                                                                                                                                                               |
| ≤50.92                                 | 5.18                       | 1.83 (0.94, 3.56)                                                                                                                                                                                                                                                                                                                                             | 3.85                        | 1.85 (1.21, 2.81)                                                                                                                                                                                                                                                                                                                                             |
| 50.93 – 56.58                          | 3.62                       | 1.31 (0.72, 2.39)                                                                                                                                                                                                                                                                                                                                             | 1.92                        | 1.10 (0.75, 1.61)                                                                                                                                                                                                                                                                                                                                             |
| 56.59 – 61.28                          | 1.76                       | 0.66 (0.34, 1.28)                                                                                                                                                                                                                                                                                                                                             | 1.85                        | 1.26 (0.88, 1.82)                                                                                                                                                                                                                                                                                                                                             |
| 61.29 – 66.17                          | 1.85                       | 0.80 (0.41, 1.58)                                                                                                                                                                                                                                                                                                                                             | 1.48                        | 1.11 (0.77, 1.59)                                                                                                                                                                                                                                                                                                                                             |
| ≥66.18                                 | 2.40                       | Reference                                                                                                                                                                                                                                                                                                                                                     | 1.34                        | Reference                                                                                                                                                                                                                                                                                                                                                     |
| <b>LA Passive Emptying Fraction, %</b> |                            |                                                                                                                                                                                                                                                                                                                                                               |                             |                                                                                                                                                                                                                                                                                                                                                               |
| ≤17.63                                 | 4.73                       | 1.47 (0.78, 2.76)                                                                                                                                                                                                                                                                                                                                             | 3.33                        | 1.24 (0.87, 1.77)                                                                                                                                                                                                                                                                                                                                             |
| 17.64 – 23.66                          | 2.95                       | 1.15 (0.61, 2.20)                                                                                                                                                                                                                                                                                                                                             | 1.82                        | 0.93 (0.65, 1.34)                                                                                                                                                                                                                                                                                                                                             |
| 23.67 – 28.68                          | 2.73                       | 1.12 (0.60, 2.12)                                                                                                                                                                                                                                                                                                                                             | 2.13                        | 1.17 (0.83, 1.64)                                                                                                                                                                                                                                                                                                                                             |
| 28.69 – 35.20                          | 2.65                       | 1.32 (0.68, 2.53)                                                                                                                                                                                                                                                                                                                                             | 1.55                        | 0.97 (0.68, 1.39)                                                                                                                                                                                                                                                                                                                                             |
| >35.20                                 | 1.90                       | Reference                                                                                                                                                                                                                                                                                                                                                     | 1.41                        | Reference                                                                                                                                                                                                                                                                                                                                                     |

|                                                  | Black Participants (n=895) |                                        | White Participants (n=3201) |                                        |
|--------------------------------------------------|----------------------------|----------------------------------------|-----------------------------|----------------------------------------|
|                                                  | Incidence Rate (per 100PY) | Hazard Ratio (95% Confidence Interval) | Incidence Rate (per 100PY)  | Hazard Ratio (95% Confidence Interval) |
| <b>LA Active Emptying Fraction, %</b>            |                            |                                        |                             |                                        |
| <35.15                                           | 4.49                       | 1.34 (0.72, 2.52)                      | 2.92                        | 1.38 (0.95, 2.01)                      |
| 35.16 – 41.05                                    | 2.79                       | 1.04 (0.58, 1.86)                      | 2.14                        | 1.15 (0.81, 1.64)                      |
| 41.06 – 46.07                                    | 3.18                       | 0.96 (0.55, 1.67)                      | 1.77                        | 1.01 (0.71, 1.45)                      |
| 46.09 – 51.88                                    | 2.01                       | 0.78 (0.41, 1.48)                      | 1.73                        | 1.04 (0.73, 1.46)                      |
| >51.89                                           | 2.59                       | Reference                              | 1.56                        | Reference                              |
| <b>Maximal LA Volume Index, ml/m<sup>2</sup></b> |                            |                                        |                             |                                        |
| <24.69                                           | 3.31                       | Reference                              | 1.88                        | Reference                              |
| 24.70 – 29.77                                    | 2.47                       | 0.77 (0.44, 1.37)                      | 1.66                        | 0.76 (0.55, 1.07)                      |
| 29.78 – 34.85                                    | 2.90                       | 0.80 (0.47, 1.37)                      | 1.70                        | 0.74 (0.53, 1.04)                      |
| 34.86 – 41.65                                    | 2.50                       | 0.70 (0.40, 1.21)                      | 1.94                        | 0.75 (0.54, 1.05)                      |
| >41.66                                           | 4.06                       | 0.79 (0.45, 1.36)                      | 2.90                        | 0.83 (0.59, 1.16)                      |
| <b>Minimal LA Volume Index, ml/m<sup>2</sup></b> |                            |                                        |                             |                                        |
| <8.96                                            | 3.31                       | Reference                              | 1.48                        | Reference                              |
| 8.97 – 11.61                                     | 1.55                       | 0.52 (0.27, 1.01)                      | 1.60                        | 0.94 (0.66, 1.33)                      |
| 11.62 – 14.56                                    | 2.61                       | 0.84 (0.48, 1.47)                      | 1.65                        | 0.78 (0.55, 1.11)                      |
| 14.57 – 19.00                                    | 3.11                       | 0.77 (0.45, 1.32)                      | 2.34                        | 1.09 (0.78, 1.53)                      |
| >19.01                                           | 4.45                       | 0.88 (0.51, 1.52)                      | 3.16                        | 0.99 (0.70, 1.41)                      |

<sup>a</sup> Quintile boundaries are based on the primary analysis. Incidence rates are unadjusted.

Abbreviations: ARIC = Atherosclerosis Risk in Communities; LA = left atrial; PY = person-years; APOE = apolipoprotein E

**eTable 6. Association of Left Atrial Measures with Incident Dementia Stratified by Sex: the ARIC Study, 2011-2019<sup>a</sup>**

|                                        | Males (n=1653)             |                                                                                                                                                                                                                                                                                                                                                                       | Females (n=2443)           |                                                                                                                                                                                                                                                                                                                                                                       |
|----------------------------------------|----------------------------|-----------------------------------------------------------------------------------------------------------------------------------------------------------------------------------------------------------------------------------------------------------------------------------------------------------------------------------------------------------------------|----------------------------|-----------------------------------------------------------------------------------------------------------------------------------------------------------------------------------------------------------------------------------------------------------------------------------------------------------------------------------------------------------------------|
|                                        | Incidence Rate (per 100PY) | Hazard Ratio (95% Confidence Interval)                                                                                                                                                                                                                                                                                                                                | Incidence Rate (per 100PY) | Hazard Ratio (95% Confidence Interval)                                                                                                                                                                                                                                                                                                                                |
|                                        |                            | Adjusted for age, race/center, APOE ε4, education, body mass index, smoking status, diabetes, systolic blood pressure, antihypertensive medications, coronary heart disease, heart failure, anticoagulant use, incident atrial fibrillation incident stroke, LAVImin (for LA function measures only), left ventricular ejection fraction, left ventricular mass index |                            | Adjusted for age, race/center, APOE ε4, education, body mass index, smoking status, diabetes, systolic blood pressure, antihypertensive medications, coronary heart disease, heart failure, anticoagulant use, incident atrial fibrillation incident stroke, LAVImin (for LA function measures only), left ventricular ejection fraction, left ventricular mass index |
| <b>LA Reservoir Strain, %</b>          |                            |                                                                                                                                                                                                                                                                                                                                                                       |                            |                                                                                                                                                                                                                                                                                                                                                                       |
| ≤26.72                                 | 5.39                       | 2.55 (1.51, 4.31)                                                                                                                                                                                                                                                                                                                                                     | 4.45                       | 1.57 (1.02, 2.42)                                                                                                                                                                                                                                                                                                                                                     |
| 26.73 – 30.59                          | 2.21                       | 1.21 (0.73, 2.00)                                                                                                                                                                                                                                                                                                                                                     | 2.02                       | 0.85 (0.57, 1.28)                                                                                                                                                                                                                                                                                                                                                     |
| 30.60 – 34.41                          | 2.15                       | 1.33 (0.81, 2.17)                                                                                                                                                                                                                                                                                                                                                     | 1.45                       | 0.71 (0.46, 1.07)                                                                                                                                                                                                                                                                                                                                                     |
| 34.42 – 39.40                          | 1.37                       | 0.93 (0.55, 1.56)                                                                                                                                                                                                                                                                                                                                                     | 1.54                       | 0.82 (0.55, 1.24)                                                                                                                                                                                                                                                                                                                                                     |
| ≥39.41                                 | 1.48                       | Reference                                                                                                                                                                                                                                                                                                                                                             | 1.61                       | Reference                                                                                                                                                                                                                                                                                                                                                             |
| <b>LA Conduit Strain, %</b>            |                            |                                                                                                                                                                                                                                                                                                                                                                       |                            |                                                                                                                                                                                                                                                                                                                                                                       |
| ≤9.90                                  | 4.79                       | 2.72 (1.57, 4.72)                                                                                                                                                                                                                                                                                                                                                     | 3.36                       | 0.98 (0.65, 1.47)                                                                                                                                                                                                                                                                                                                                                     |
| 9.91 – 13.06                           | 2.31                       | 1.64 (0.93, 2.87)                                                                                                                                                                                                                                                                                                                                                     | 2.74                       | 1.12 (0.76, 1.64)                                                                                                                                                                                                                                                                                                                                                     |
| 13.07 – 15.89                          | 2.00                       | 1.68 (0.96, 2.94)                                                                                                                                                                                                                                                                                                                                                     | 1.71                       | 0.81 (0.54, 1.22)                                                                                                                                                                                                                                                                                                                                                     |
| 15.90 – 19.52                          | 1.92                       | 1.75 (0.99, 3.06)                                                                                                                                                                                                                                                                                                                                                     | 1.68                       | 0.89 (0.60, 1.32)                                                                                                                                                                                                                                                                                                                                                     |
| ≥19.53                                 | 0.98                       | Reference                                                                                                                                                                                                                                                                                                                                                             | 1.46                       | Reference                                                                                                                                                                                                                                                                                                                                                             |
| <b>LA Contractile Strain, %</b>        |                            |                                                                                                                                                                                                                                                                                                                                                                       |                            |                                                                                                                                                                                                                                                                                                                                                                       |
| ≤13.47                                 | 3.44                       | 1.64 (1.03, 2.62)                                                                                                                                                                                                                                                                                                                                                     | 3.20                       | 1.50 (0.99, 2.26)                                                                                                                                                                                                                                                                                                                                                     |
| 13.48 – 16.62                          | 2.52                       | 1.09 (0.69, 1.72)                                                                                                                                                                                                                                                                                                                                                     | 1.95                       | 1.02 (0.69, 1.51)                                                                                                                                                                                                                                                                                                                                                     |
| 16.63 – 19.17                          | 2.22                       | 1.17 (0.76, 1.82)                                                                                                                                                                                                                                                                                                                                                     | 1.79                       | 0.96 (0.64, 1.43)                                                                                                                                                                                                                                                                                                                                                     |
| 19.18 – 22.37                          | 1.92                       | 1.06 (0.67, 1.66)                                                                                                                                                                                                                                                                                                                                                     | 2.06                       | 1.10 (0.75, 1.61)                                                                                                                                                                                                                                                                                                                                                     |
| >22.38                                 | 1.90                       | Reference                                                                                                                                                                                                                                                                                                                                                             | 1.72                       | Reference                                                                                                                                                                                                                                                                                                                                                             |
| <b>LA Emptying Fraction, %</b>         |                            |                                                                                                                                                                                                                                                                                                                                                                       |                            |                                                                                                                                                                                                                                                                                                                                                                       |
| ≤50.92                                 | 4.36                       | 2.00 (1.16, 3.45)                                                                                                                                                                                                                                                                                                                                                     | 4.10                       | 1.76 (1.10, 2.82)                                                                                                                                                                                                                                                                                                                                                     |
| 50.93 – 56.58                          | 2.79                       | 1.45 (0.88, 2.39)                                                                                                                                                                                                                                                                                                                                                     | 2.04                       | 1.01 (0.66, 1.55)                                                                                                                                                                                                                                                                                                                                                     |
| 56.59 – 61.28                          | 1.96                       | 1.18 (0.72, 1.93)                                                                                                                                                                                                                                                                                                                                                     | 1.74                       | 0.99 (0.66, 1.51)                                                                                                                                                                                                                                                                                                                                                     |
| 61.29 – 66.17                          | 1.47                       | 0.94 (0.57, 1.56)                                                                                                                                                                                                                                                                                                                                                     | 1.61                       | 1.07 (0.70, 1.62)                                                                                                                                                                                                                                                                                                                                                     |
| >66.18                                 | 1.58                       | Reference                                                                                                                                                                                                                                                                                                                                                             | 1.45                       | Reference                                                                                                                                                                                                                                                                                                                                                             |
| <b>LA Passive Emptying Fraction, %</b> |                            |                                                                                                                                                                                                                                                                                                                                                                       |                            |                                                                                                                                                                                                                                                                                                                                                                       |
| ≤17.63                                 | 3.58                       | 1.36 (0.83, 2.22)                                                                                                                                                                                                                                                                                                                                                     | 3.73                       | 1.17 (0.79, 1.72)                                                                                                                                                                                                                                                                                                                                                     |
| 17.64 – 23.66                          | 2.39                       | 1.32 (0.81, 2.17)                                                                                                                                                                                                                                                                                                                                                     | 1.82                       | 0.77 (0.51, 1.16)                                                                                                                                                                                                                                                                                                                                                     |
| 23.67 – 28.68                          | 2.25                       | 1.18 (0.72, 1.95)                                                                                                                                                                                                                                                                                                                                                     | 2.29                       | 1.15 (0.79, 1.68)                                                                                                                                                                                                                                                                                                                                                     |
| 28.69 – 35.20                          | 1.94                       | 1.16 (0.69, 1.94)                                                                                                                                                                                                                                                                                                                                                     | 1.66                       | 0.94 (0.63, 1.40)                                                                                                                                                                                                                                                                                                                                                     |
| >35.20                                 | 1.45                       | Reference                                                                                                                                                                                                                                                                                                                                                             | 1.50                       | Reference                                                                                                                                                                                                                                                                                                                                                             |



|                                                  | Males (n=1653)             |                                        | Females (n=2443)           |                                        |
|--------------------------------------------------|----------------------------|----------------------------------------|----------------------------|----------------------------------------|
|                                                  | Incidence Rate (per 100PY) | Hazard Ratio (95% Confidence Interval) | Incidence Rate (per 100PY) | Hazard Ratio (95% Confidence Interval) |
| <b>LA Active Emptying Fraction, %</b>            |                            |                                        |                            |                                        |
| <35.15                                           | 3.47                       | 1.44 (0.87, 2.37)                      | 3.17                       | 1.37 (0.90, 2.09)                      |
| 35.16 – 41.05                                    | 2.49                       | 1.21 (0.76, 1.91)                      | 2.15                       | 1.05 (0.70, 1.57)                      |
| 41.06 – 46.07                                    | 2.33                       | 1.12 (0.71, 1.76)                      | 1.96                       | 0.98 (0.66, 1.46)                      |
| 46.09 – 51.88                                    | 1.91                       | 1.05 (0.66, 1.66)                      | 1.69                       | 0.91 (0.60, 1.36)                      |
| >51.89                                           | 1.79                       | Reference                              | 1.70                       | Reference                              |
| <b>Maximal LA Volume Index, ml/m<sup>2</sup></b> |                            |                                        |                            |                                        |
| <24.69                                           | 2.20                       | Reference                              | 2.07                       | Reference                              |
| 24.70 – 29.77                                    | 2.02                       | 0.77 (0.49, 1.21)                      | 1.66                       | 0.72 (0.49, 1.05)                      |
| 29.78 – 34.85                                    | 1.93                       | 0.79 (0.50, 1.25)                      | 1.99                       | 0.71 (0.49, 1.02)                      |
| 34.86 – 41.65                                    | 2.32                       | 0.84 (0.54, 1.33)                      | 1.93                       | 0.62 (0.43, 0.90)                      |
| >41.66                                           | 3.18                       | 0.82 (0.52, 1.29)                      | 3.18                       | 0.72 (0.49, 1.04)                      |
| <b>Minimal LA Volume Index, ml/m<sup>2</sup></b> |                            |                                        |                            |                                        |
| <8.96                                            | 1.96                       | Reference                              | 1.64                       | Reference                              |
| 8.97 – 11.61                                     | 1.53                       | 0.85 (0.52, 1.39)                      | 1.63                       | 0.87 (0.58, 1.29)                      |
| 11.62 – 14.56                                    | 2.01                       | 0.89 (0.56, 1.40)                      | 1.76                       | 0.75 (0.51, 1.11)                      |
| 14.57 – 19.00                                    | 2.43                       | 1.04 (0.66, 1.63)                      | 2.58                       | 0.94 (0.65, 1.37)                      |
| >19.01                                           | 3.89                       | 1.06 (0.67, 1.67)                      | 3.22                       | 0.85 (0.57, 1.25)                      |

<sup>a</sup> Quintile boundaries are based on primary analysis. Incidence rates are unadjusted.

Abbreviations: ARIC = Atherosclerosis Risk in Communities; LA = left atrial; PY = person-years; APOE = apolipoprotein E

**eTable 7. Hazard Ratios for Dementia by Different Left Atrial Reservoir Strain Cutoffs: The ARIC Study, 2011-2019**

|                   | No. dementia events / No. total | Hazard Ratio (95% Confidence Interval)                                                                                                                                                                                                                                                                                                                      | P value |
|-------------------|---------------------------------|-------------------------------------------------------------------------------------------------------------------------------------------------------------------------------------------------------------------------------------------------------------------------------------------------------------------------------------------------------------|---------|
|                   |                                 | Adjusted for age, sex, race/center, APOE ε4, education, body mass index, smoking status, diabetes, systolic blood pressure, antihypertensive medications, coronary heart disease, heart failure, anticoagulant use, incident atrial fibrillation and incident stroke, LAVI <sub>min</sub> , left ventricular ejection fraction, left ventricular mass index |         |
| Cutoff 1          |                                 |                                                                                                                                                                                                                                                                                                                                                             |         |
| LA Reservoir <22% | 78 / 311                        | 1.69 (1.24, 2.30)                                                                                                                                                                                                                                                                                                                                           | 0.001   |
| LA Reservoir ≥22% | 453 / 3785                      | Reference                                                                                                                                                                                                                                                                                                                                                   |         |
| Cutoff 2          |                                 |                                                                                                                                                                                                                                                                                                                                                             |         |
| LA Reservoir <23% | 96 / 375                        | 1.91 (1.44, 2.55)                                                                                                                                                                                                                                                                                                                                           | <0.001  |
| LA Reservoir ≥23% | 435 / 3721                      | Reference                                                                                                                                                                                                                                                                                                                                                   |         |
| Cutoff 3          |                                 |                                                                                                                                                                                                                                                                                                                                                             |         |
| LA Reservoir <24% | 112 / 453                       | 1.98 (1.52, 2.59)                                                                                                                                                                                                                                                                                                                                           | <0.001  |
| LA Reservoir ≥24% | 419 / 3643                      | Reference                                                                                                                                                                                                                                                                                                                                                   |         |
| Cutoff 4          |                                 |                                                                                                                                                                                                                                                                                                                                                             |         |
| LA Reservoir <25% | 134 / 558                       | 2.08 (1.62, 2.68)                                                                                                                                                                                                                                                                                                                                           | <0.001  |
| LA Reservoir ≥25% | 397 / 3538                      | Reference                                                                                                                                                                                                                                                                                                                                                   |         |
| Cutoff 5          |                                 |                                                                                                                                                                                                                                                                                                                                                             |         |
| LA Reservoir <26% | 157 / 686                       | 2.00 (1.57, 2.54)                                                                                                                                                                                                                                                                                                                                           | <0.001  |
| LA Reservoir ≥26% | 374 / 3410                      | Reference                                                                                                                                                                                                                                                                                                                                                   |         |
| Cutoff 6          |                                 |                                                                                                                                                                                                                                                                                                                                                             |         |
| LA Reservoir <27% | 199 / 864                       | 2.10 (1.68, 2.61)                                                                                                                                                                                                                                                                                                                                           | <0.001  |
| LA Reservoir ≥27% | 332 / 3232                      | Reference                                                                                                                                                                                                                                                                                                                                                   |         |
| Cutoff 7          |                                 |                                                                                                                                                                                                                                                                                                                                                             |         |
| LA Reservoir <28% | 224 / 1071                      | 1.80 (1.45, 2.24)                                                                                                                                                                                                                                                                                                                                           | <0.001  |
| LA Reservoir ≥28% | 307 / 3025                      | Reference                                                                                                                                                                                                                                                                                                                                                   |         |
| Cutoff 8          |                                 |                                                                                                                                                                                                                                                                                                                                                             |         |
| LA Reservoir <29% | 255 / 1271                      | 1.80 (1.46, 2.22)                                                                                                                                                                                                                                                                                                                                           | <0.001  |
| LA Reservoir ≥29% | 276 / 2825                      | Reference                                                                                                                                                                                                                                                                                                                                                   |         |
| Cutoff 9          |                                 |                                                                                                                                                                                                                                                                                                                                                             |         |
| LA Reservoir <30% | 281 / 1485                      | 1.63 (1.33, 2.00)                                                                                                                                                                                                                                                                                                                                           | <0.001  |
| LA Reservoir ≥30% | 250 / 2611                      | Reference                                                                                                                                                                                                                                                                                                                                                   |         |
| Cutoff 10         |                                 |                                                                                                                                                                                                                                                                                                                                                             |         |
| LA Reservoir <31% | 299 / 1719                      | 1.41 (1.15, 1.72)                                                                                                                                                                                                                                                                                                                                           | 0.001   |
| LA Reservoir ≥31% | 232 / 2377                      | Reference                                                                                                                                                                                                                                                                                                                                                   |         |
| Cutoff 11         |                                 |                                                                                                                                                                                                                                                                                                                                                             |         |

|                   | <b>No. dementia events / No. total</b> | <b>Hazard Ratio (95% Confidence Interval)</b> | <b>P value</b> |
|-------------------|----------------------------------------|-----------------------------------------------|----------------|
| LA Reservoir <32% | 329 / 1945                             | 1.41 (1.15, 1.73)                             | 0.001          |
| LA Reservoir ≥32% | 202 / 2151                             | Reference                                     |                |
| Cutoff 12         |                                        |                                               |                |
| LA Reservoir <33% | 350 / 2173                             | 1.32 (1.08, 1.62)                             | 0.008          |
| LA Reservoir ≥33% | 181 / 1923                             | Reference                                     |                |
| Cutoff 13         |                                        |                                               |                |
| LA Reservoir <34% | 369 / 2376                             | 1.23 (0.99, 1.51)                             | 0.06           |
| LA Reservoir ≥34% | 162 / 1720                             | Reference                                     |                |

Abbreviations: ARIC = Atherosclerosis Risk in Communities; LA = left atrial; APOE = apolipoprotein E

**eTable 8. Baseline Participant Characteristics (by Left Atrial Reservoir Strain <27% vs. ≥27%): The ARIC Study, 2011-2013<sup>a</sup>**

|                                                          | LA Reservoir <27%<br>(n=864) | LA Reservoir ≥27%<br>(n=3,232) |
|----------------------------------------------------------|------------------------------|--------------------------------|
| <b>Demographics</b>                                      |                              |                                |
| Age, mean (SD), years                                    | 76.8 (5.3)                   | 74.6 (4.7)                     |
| Women, No. (%)                                           | 527 (61.0%)                  | 1916 (59.3%)                   |
| Men, No. (%)                                             | 337 (39.0%)                  | 1316 (40.7%)                   |
| Black race, No. (%)                                      | 232 (26.9%)                  | 663 (20.5%)                    |
| White race, No. (%)                                      | 632 (73.1%)                  | 2569 (79.5%)                   |
| Less than high school education, No. (%)                 | 155 (17.9%)                  | 349 (10.8%)                    |
| Current smokers, No. (%)                                 | 46 (5.3%)                    | 182 (5.6%)                     |
| <b>Clinical Characteristics</b>                          |                              |                                |
| Body mass index, median (IQR), kg/m <sup>2</sup>         | 28.2 (25.1-31.9)             | 27.6 (24.8-31.0)               |
| Systolic blood pressure, median (IQR), mmHg              | 131.5 (119.5-144.0)          | 128.5 (117.5-139.5)            |
| Antihypertensive medication use, No. (%)                 | 710 (82.2%)                  | 2228 (68.9%)                   |
| Diabetes, No. (%)                                        | 323 (37.4%)                  | 864 (26.7%)                    |
| >1 APOE ε4 allele, No. (%)                               | 239 (27.7%)                  | 880 (27.2%)                    |
| Coronary heart disease, No. (%)                          | 187 (21.6%)                  | 333 (10.3%)                    |
| Heart failure, No. (%)                                   | 179 (20.7%)                  | 189 (5.8%)                     |
| Anticoagulant medication use, No. (%)                    | 25 (2.9%)                    | 65 (2.0%)                      |
| <b>Echocardiogram Measures</b>                           |                              |                                |
| LA reservoir strain, mean (SD), %                        | 22.5 (4.0)                   | 35.5 (5.9)                     |
| LA conduit strain, mean (SD), %                          | 9.8 (3.9)                    | 16.2 (5.3)                     |
| LA contractile strain, mean (SD), %                      | 12.8 (4.3)                   | 19.3 (5.0)                     |
| LA emptying fraction, mean (SD), %                       | 47.4 (8.2)                   | 61.2 (7.2)                     |
| LA passive emptying fraction, mean (SD), %               | 19.9 (9.2)                   | 28.3 (9.9)                     |
| LA active emptying fraction, mean (SD), %                | 33.9 (10.3)                  | 45.6 (9.1)                     |
| Maximal LA volume index, median (IQR), ml/m <sup>2</sup> | 39.5 (31.1-47.8)             | 30.8 (25.2-37.5)               |
| Minimal LA volume index, median (IQR), ml/m <sup>2</sup> | 20.3 (15.5-26.3)             | 11.9 (9.0-15.4)                |
| LV ejection fraction, median (IQR), %                    | 64.3 (59.8-68.5)             | 66.5 (63.1-69.7)               |
| LV mass index, median (IQR), %                           | 83.7 (72.2-101.3)            | 73.5 (64.2-84.5)               |

<sup>a</sup> Restricted to the analytic sample, which required participants to have an echocardiogram completed at visit 5 (2011-2013) and to not meet any exclusion criteria.

Abbreviations: ARIC = Atherosclerosis Risk in Communities; SD = standard deviation; IQR = interquartile range; APOE = apolipoprotein E; LA = left atrial; LV = left ventricular

**eTable 9. Association of Left Atrial Reservoir Strain (Binary Variable) with Incident Dementia: The ARIC Study, 2011-2019**

|                                    | Incidence Rate (per 100 PY) | Hazard Ratio (95% Confidence Interval)                                                                                                                                                                         |                                                                                  |                                                                                                                          |
|------------------------------------|-----------------------------|----------------------------------------------------------------------------------------------------------------------------------------------------------------------------------------------------------------|----------------------------------------------------------------------------------|--------------------------------------------------------------------------------------------------------------------------|
|                                    |                             | Model 1: age, sex, race/center, APOE ε4, education, body mass index, smoking status, diabetes, systolic blood pressure, antihypertensive medications, coronary heart disease, heart failure, anticoagulant use | Model 2: adjusted for model 1 plus incident atrial fibrillation, incident stroke | Model 3: adjusted for model 2 plus LAVI <sub>min</sub> , left ventricular ejection fraction, left ventricular mass index |
| LA Reservoir Strain <27% (n=864)   | 4.72                        | 2.21 (1.84, 2.67)                                                                                                                                                                                              | 2.14 (1.77, 2.59)                                                                | 2.10 (1.68, 2.61)                                                                                                        |
| LA Reservoir Strain ≥27% (n=3,232) | 1.68                        | Reference                                                                                                                                                                                                      | Reference                                                                        | Reference                                                                                                                |

Abbreviations: ARIC = Atherosclerosis Risk in Communities; LA = left atrial; PY = person-years; APOE = apolipoprotein E

**eTable 10. Brain MRI Measures (2011-13) Among Participants with Left Atrial Reservoir Strain <27%, Stratified by Dementia**

|                                                                | <b>Dementia<sup>a</sup><br/>(n=81)</b> | <b>No dementia<br/>(n=202)</b> | <b>P value</b> |
|----------------------------------------------------------------|----------------------------------------|--------------------------------|----------------|
| White matter hyperintensity volume, mean (SD), cm <sup>3</sup> | 23.4 (18.1)                            | 19.2 (20.4)                    | 0.11           |
| Lacunar infarcts, No. (%)                                      | 21 (25.9%)                             | 34 (16.8%)                     | 0.08           |
| Cortical infarcts, No. (%)                                     | 11 (13.6%)                             | 23 (11.4%)                     | 0.66           |
| Any infarcts, No. (%)                                          | 29 (35.8%)                             | 49 (24.3%)                     | 0.04           |
| Cerebral microbleeds, No. (%)                                  | 30 (37.0%)                             | 63 (31.2%)                     | 0.34           |

<sup>a</sup> Dementia was ascertained through 2019.

**eTable 11. Hazard Ratios for Dementia Among Participants Without Incident Atrial Fibrillation or Stroke: The ARIC Study, 2011-2019 (n=3,466)<sup>a</sup>**

|                                        |                            | Hazard Ratio (95% Confidence Interval)                                                                                                                                                                   |                                                                                                    |
|----------------------------------------|----------------------------|----------------------------------------------------------------------------------------------------------------------------------------------------------------------------------------------------------|----------------------------------------------------------------------------------------------------|
|                                        | Incidence Rate (per 100PY) | Model 1: adjusted for age, sex, race/center, APOE ε4, education, body mass index, smoking status, diabetes, systolic blood pressure, antihypertensive medications, coronary heart disease, heart failure | Model 2: adjusted for model 1 plus left ventricular ejection fraction, left ventricular mass index |
| <b>LA Reservoir Strain, %</b>          |                            |                                                                                                                                                                                                          |                                                                                                    |
| <26.72                                 | 4.16                       | 2.08 (1.51, 2.86)                                                                                                                                                                                        | 2.29 (1.55, 3.38)                                                                                  |
| 26.73 – 30.59                          | 1.76                       | 0.98 (0.70, 1.37)                                                                                                                                                                                        | 1.04 (0.73, 1.50)                                                                                  |
| 30.60 – 34.41                          | 1.59                       | 0.95 (0.68, 1.34)                                                                                                                                                                                        | 1.00 (0.70, 1.42)                                                                                  |
| 34.42 – 39.40                          | 1.37                       | 0.90 (0.64, 1.28)                                                                                                                                                                                        | 0.93 (0.65, 1.32)                                                                                  |
| >39.41                                 | 1.41                       | Reference                                                                                                                                                                                                | Reference                                                                                          |
| <b>LA Conduit Strain, %</b>            |                            |                                                                                                                                                                                                          |                                                                                                    |
| ≤9.90                                  | 3.16                       | 1.56 (1.11, 2.18)                                                                                                                                                                                        | 1.37 (0.96, 1.97)                                                                                  |
| 9.91 – 13.06                           | 2.14                       | 1.32 (0.94, 1.87)                                                                                                                                                                                        | 1.23 (0.86, 1.76)                                                                                  |
| 13.07 – 15.89                          | 1.70                       | 1.08 (0.76, 1.54)                                                                                                                                                                                        | 1.04 (0.73, 1.49)                                                                                  |
| 15.90 – 19.52                          | 1.56                       | 1.09 (0.77, 1.54)                                                                                                                                                                                        | 1.07 (0.75, 1.52)                                                                                  |
| ≥19.53                                 | 1.24                       | Reference                                                                                                                                                                                                | Reference                                                                                          |
| <b>LA Contractile Strain, %</b>        |                            |                                                                                                                                                                                                          |                                                                                                    |
| ≤13.47                                 | 2.84                       | 1.77 (1.29, 2.43)                                                                                                                                                                                        | 1.75 (1.24, 2.48)                                                                                  |
| 13.48 – 16.62                          | 1.85                       | 1.20 (0.86, 1.67)                                                                                                                                                                                        | 1.20 (0.86, 1.68)                                                                                  |
| 16.63 – 19.17                          | 1.62                       | 1.02 (0.73, 1.42)                                                                                                                                                                                        | 1.02 (0.72, 1.43)                                                                                  |
| 19.18 – 22.37                          | 1.76                       | 1.13 (0.82, 1.56)                                                                                                                                                                                        | 1.12 (0.81, 1.56)                                                                                  |
| ≥22.38                                 | 1.58                       | Reference                                                                                                                                                                                                | Reference                                                                                          |
| <b>LA Emptying Fraction, %</b>         |                            |                                                                                                                                                                                                          |                                                                                                    |
| ≤50.92                                 | 3.48                       | 1.77 (1.28, 2.45)                                                                                                                                                                                        | 2.06 (1.36, 3.13)                                                                                  |
| 50.93 – 56.58                          | 2.03                       | 1.18 (0.84, 1.64)                                                                                                                                                                                        | 1.28 (0.88, 1.86)                                                                                  |
| 56.59 – 61.28                          | 1.63                       | 1.04 (0.74, 1.47)                                                                                                                                                                                        | 1.11 (0.77, 1.59)                                                                                  |
| 61.29 – 66.17                          | 1.43                       | 1.03 (0.73, 1.47)                                                                                                                                                                                        | 1.06 (0.74, 1.52)                                                                                  |
| ≥66.18                                 | 1.35                       | Reference                                                                                                                                                                                                | Reference                                                                                          |
| <b>LA Passive Emptying Fraction, %</b> |                            |                                                                                                                                                                                                          |                                                                                                    |
| ≤17.63                                 | 3.01                       | 1.42 (1.02, 1.97)                                                                                                                                                                                        | 1.30 (0.91, 1.84)                                                                                  |
| 17.64 – 23.66                          | 1.68                       | 0.96 (0.67, 1.37)                                                                                                                                                                                        | 0.91 (0.63, 1.31)                                                                                  |
| 23.67 – 28.68                          | 2.04                       | 1.23 (0.88, 1.71)                                                                                                                                                                                        | 1.19 (0.85, 1.66)                                                                                  |
| 28.69 – 35.20                          | 1.55                       | 0.98 (0.69, 1.39)                                                                                                                                                                                        | 0.96 (0.68, 1.37)                                                                                  |
| ≥35.20                                 | 1.36                       | Reference                                                                                                                                                                                                | Reference                                                                                          |
| <b>LA Active Emptying Fraction, %</b>  |                            |                                                                                                                                                                                                          |                                                                                                    |
| <35.15                                 | 2.77                       | 1.55 (1.12, 2.13)                                                                                                                                                                                        | 1.59 (1.09, 2.30)                                                                                  |
| 35.16 – 41.05                          | 1.93                       | 1.21 (0.87, 1.68)                                                                                                                                                                                        | 1.22 (0.85, 1.73)                                                                                  |
| 41.06 – 46.07                          | 1.80                       | 1.03 (0.74, 1.42)                                                                                                                                                                                        | 1.03 (0.74, 1.46)                                                                                  |
| 46.09 – 51.88                          | 1.56                       | 0.98 (0.70, 1.37)                                                                                                                                                                                        | 0.98 (0.70, 1.38)                                                                                  |

|                                                          | Incidence Rate<br>(per 100PY) | Hazard Ratio (95% Confidence Interval)                                                                                                                                                                                  |                                                                                                                |
|----------------------------------------------------------|-------------------------------|-------------------------------------------------------------------------------------------------------------------------------------------------------------------------------------------------------------------------|----------------------------------------------------------------------------------------------------------------|
|                                                          |                               | Model 1: adjusted for age, sex,<br>race/center, APOE ε4, education, body<br>mass index, smoking status, diabetes,<br>systolic blood pressure, antihypertensive<br>medications, coronary heart disease, heart<br>failure | Model 2: adjusted for<br>model 1 plus left<br>ventricular ejection<br>fraction, left ventricular<br>mass index |
| >51.89                                                   | 1.56                          | Reference                                                                                                                                                                                                               | Reference                                                                                                      |
| <b>Maximal LA<br/>Volume Index,<br/>ml/m<sup>2</sup></b> |                               |                                                                                                                                                                                                                         |                                                                                                                |
| ≤24.69                                                   | 1.90                          | Reference                                                                                                                                                                                                               | Reference                                                                                                      |
| 24.70 – 29.77                                            | 1.77                          | 0.84 (0.61, 1.14)                                                                                                                                                                                                       | 0.81 (0.60, 1.11)                                                                                              |
| 29.78 – 34.85                                            | 1.70                          | 0.77 (0.56, 1.06)                                                                                                                                                                                                       | 0.75 (0.54, 1.03)                                                                                              |
| 34.86 – 41.65                                            | 1.69                          | 0.75 (0.54, 1.04)                                                                                                                                                                                                       | 0.71 (0.51, 0.99)                                                                                              |
| ≥41.66                                                   | 2.50                          | 0.93 (0.67, 1.27)                                                                                                                                                                                                       | 0.84 (0.60, 1.17)                                                                                              |
| <b>Minimal LA<br/>Volume Index,<br/>ml/m<sup>2</sup></b> |                               |                                                                                                                                                                                                                         |                                                                                                                |
| ≤8.96                                                    | 1.59                          | Reference                                                                                                                                                                                                               | Reference                                                                                                      |
| 8.97 – 11.61                                             | 1.56                          | 0.95 (0.68, 1.32)                                                                                                                                                                                                       | 0.92 (0.66, 1.28)                                                                                              |
| 11.62 – 14.56                                            | 1.62                          | 0.84 (0.60, 1.18)                                                                                                                                                                                                       | 0.81 (0.58, 1.13)                                                                                              |
| 14.57 – 19.00                                            | 2.19                          | 1.06 (0.77, 1.45)                                                                                                                                                                                                       | 0.99 (0.71, 1.36)                                                                                              |
| ≥19.01                                                   | 2.74                          | 1.13 (0.81, 1.58)                                                                                                                                                                                                       | 1.01 (0.71, 1.43)                                                                                              |

<sup>a</sup> Quintile boundaries are based on the primary analysis. Incidence rates are unadjusted.

Abbreviations: ARIC = Atherosclerosis Risk in Communities; LA = left atrial; PY = person-years; APOE = apolipoprotein E



**eTable 12. Hazard Ratios for Incident Dementia Among Participants Not Taking Anticoagulants: The ARIC Study, 2011-2019 (n=4,006)<sup>a</sup>**

|                                        |                            | Hazard Ratio (95% Confidence Interval)                                                                                                                                                                   |                                                                                  |                                                                                                                                                         |
|----------------------------------------|----------------------------|----------------------------------------------------------------------------------------------------------------------------------------------------------------------------------------------------------|----------------------------------------------------------------------------------|---------------------------------------------------------------------------------------------------------------------------------------------------------|
|                                        | Incidence Rate (per 100PY) | Model 1: adjusted for age, sex, race/center, APOE ε4, education, body mass index, smoking status, diabetes, systolic blood pressure, antihypertensive medications, coronary heart disease, heart failure | Model 2: adjusted for model 1 plus incident atrial fibrillation, incident stroke | Model 3: adjusted for model 2 plus LAVI <sub>min</sub> (for LA function measures only), left ventricular ejection fraction, left ventricular mass index |
| <b>LA Reservoir Strain, %</b>          |                            |                                                                                                                                                                                                          |                                                                                  |                                                                                                                                                         |
| <26.72                                 | 4.74                       | 2.03 (1.53, 2.69)                                                                                                                                                                                        | 1.94 (1.47, 2.58)                                                                | 1.90 (1.36, 2.65)                                                                                                                                       |
| 26.73 – 30.59                          | 2.12                       | 1.02 (0.76, 1.38)                                                                                                                                                                                        | 0.99 (0.74, 1.34)                                                                | 1.00 (0.73, 1.37)                                                                                                                                       |
| 30.60 – 34.41                          | 1.69                       | 0.90 (0.66, 1.22)                                                                                                                                                                                        | 0.89 (0.65, 1.21)                                                                | 0.90 (0.65, 1.23)                                                                                                                                       |
| 34.42 – 39.40                          | 1.47                       | 0.86 (0.63, 1.19)                                                                                                                                                                                        | 0.86 (0.62, 1.18)                                                                | 0.86 (0.63, 1.19)                                                                                                                                       |
| >39.41                                 | 1.58                       | Reference                                                                                                                                                                                                | Reference                                                                        | Reference                                                                                                                                               |
| <b>LA Conduit Strain, %</b>            |                            |                                                                                                                                                                                                          |                                                                                  |                                                                                                                                                         |
| <9.90                                  | 3.89                       | 1.79 (1.33, 2.42)                                                                                                                                                                                        | 1.74 (1.28, 2.35)                                                                | 1.48 (1.07, 2.04)                                                                                                                                       |
| 9.91 – 13.06                           | 2.57                       | 1.47 (1.08, 2.00)                                                                                                                                                                                        | 1.40 (1.03, 1.92)                                                                | 1.31 (0.95, 1.79)                                                                                                                                       |
| 13.07 – 15.89                          | 1.86                       | 1.16 (0.84, 1.61)                                                                                                                                                                                        | 1.15 (0.83, 1.60)                                                                | 1.11 (0.80, 1.54)                                                                                                                                       |
| 15.90 – 19.52                          | 1.76                       | 1.18 (0.86, 1.64)                                                                                                                                                                                        | 1.19 (0.86, 1.64)                                                                | 1.17 (0.85, 1.62)                                                                                                                                       |
| >19.53                                 | 1.27                       | Reference                                                                                                                                                                                                | Reference                                                                        | Reference                                                                                                                                               |
| <b>LA Contractile Strain, %</b>        |                            |                                                                                                                                                                                                          |                                                                                  |                                                                                                                                                         |
| <13.47                                 | 3.24                       | 1.72 (1.30, 2.26)                                                                                                                                                                                        | 1.67 (1.26, 2.20)                                                                | 1.53 (1.12, 2.08)                                                                                                                                       |
| 13.48 – 16.62                          | 2.12                       | 1.13 (0.85, 1.51)                                                                                                                                                                                        | 1.08 (0.80, 1.44)                                                                | 1.03 (0.77, 1.39)                                                                                                                                       |
| 16.63 – 19.17                          | 1.93                       | 1.08 (0.81, 1.46)                                                                                                                                                                                        | 1.09 (0.81, 1.46)                                                                | 1.05 (0.78, 1.41)                                                                                                                                       |
| 19.18 – 22.37                          | 2.04                       | 1.16 (0.87, 1.55)                                                                                                                                                                                        | 1.13 (0.85, 1.52)                                                                | 1.10 (0.82, 1.48)                                                                                                                                       |
| >22.38                                 | 1.82                       | Reference                                                                                                                                                                                                | Reference                                                                        | Reference                                                                                                                                               |
| <b>LA Emptying Fraction, %</b>         |                            |                                                                                                                                                                                                          |                                                                                  |                                                                                                                                                         |
| <50.92                                 | 4.17                       | 1.86 (1.40, 2.47)                                                                                                                                                                                        | 1.77 (1.34, 2.36)                                                                | 1.85 (1.29, 2.64)                                                                                                                                       |
| 50.93 – 56.58                          | 2.33                       | 1.19 (0.88, 1.60)                                                                                                                                                                                        | 1.17 (0.87, 1.58)                                                                | 1.20 (0.87, 1.65)                                                                                                                                       |
| 56.59 – 61.28                          | 1.82                       | 1.08 (0.79, 1.47)                                                                                                                                                                                        | 1.07 (0.79, 1.46)                                                                | 1.09 (0.79, 1.50)                                                                                                                                       |
| 61.29 – 66.17                          | 1.56                       | 1.02 (0.74, 1.41)                                                                                                                                                                                        | 1.02 (0.74, 1.40)                                                                | 1.03 (0.75, 1.42)                                                                                                                                       |
| >66.18                                 | 1.50                       | Reference                                                                                                                                                                                                | Reference                                                                        | Reference                                                                                                                                               |
| <b>LA Passive Emptying Fraction, %</b> |                            |                                                                                                                                                                                                          |                                                                                  |                                                                                                                                                         |
| <17.63                                 | 3.63                       | 1.49 (1.12, 1.99)                                                                                                                                                                                        | 1.44 (1.08, 1.93)                                                                | 1.27 (0.93, 1.73)                                                                                                                                       |
| 17.64 – 23.66                          | 2.09                       | 1.07 (0.78, 1.45)                                                                                                                                                                                        | 1.06 (0.78, 1.44)                                                                | 0.99 (0.73, 1.37)                                                                                                                                       |
| 23.67 – 28.68                          | 2.28                       | 1.25 (0.93, 1.69)                                                                                                                                                                                        | 1.24 (0.92, 1.67)                                                                | 1.17 (0.86, 1.59)                                                                                                                                       |
| 28.69 – 35.20                          | 1.77                       | 1.05 (0.77, 1.44)                                                                                                                                                                                        | 1.06 (0.78, 1.45)                                                                | 1.05 (0.76, 1.43)                                                                                                                                       |
| >35.20                                 | 1.47                       | Reference                                                                                                                                                                                                | Reference                                                                        | Reference                                                                                                                                               |
| <b>LA Active Emptying Fraction, %</b>  |                            |                                                                                                                                                                                                          |                                                                                  |                                                                                                                                                         |

|                                                  |                            | Hazard Ratio (95% Confidence Interval)                                                                                                                                                                   |                                                                                  |                                                                                                                                                         |
|--------------------------------------------------|----------------------------|----------------------------------------------------------------------------------------------------------------------------------------------------------------------------------------------------------|----------------------------------------------------------------------------------|---------------------------------------------------------------------------------------------------------------------------------------------------------|
|                                                  | Incidence Rate (per 100PY) | Model 1: adjusted for age, sex, race/center, APOE ε4, education, body mass index, smoking status, diabetes, systolic blood pressure, antihypertensive medications, coronary heart disease, heart failure | Model 2: adjusted for model 1 plus incident atrial fibrillation, incident stroke | Model 3: adjusted for model 2 plus LAVI <sub>min</sub> (for LA function measures only), left ventricular ejection fraction, left ventricular mass index |
| <35.15                                           | 3.24                       | 1.56 (1.18, 2.05)                                                                                                                                                                                        | 1.50 (1.14, 1.98)                                                                | 1.41 (1.02, 1.95)                                                                                                                                       |
| 35.16 – 41.05                                    | 2.26                       | 1.22 (0.92, 1.63)                                                                                                                                                                                        | 1.17 (0.88, 1.57)                                                                | 1.11 (0.81, 1.51)                                                                                                                                       |
| 41.06 – 46.07                                    | 2.15                       | 1.12 (0.84, 1.50)                                                                                                                                                                                        | 1.12 (0.84, 1.50)                                                                | 1.07 (0.79, 1.44)                                                                                                                                       |
| 46.09 – 51.88                                    | 1.76                       | 0.99 (0.73, 1.34)                                                                                                                                                                                        | 0.99 (0.73, 1.34)                                                                | 0.98 (0.72, 1.33)                                                                                                                                       |
| >51.89                                           | 1.72                       | Reference                                                                                                                                                                                                | Reference                                                                        | Reference                                                                                                                                               |
| <b>Maximal LA Volume Index, ml/m<sup>2</sup></b> |                            |                                                                                                                                                                                                          |                                                                                  |                                                                                                                                                         |
| <24.69                                           | 2.10                       | Reference                                                                                                                                                                                                | Reference                                                                        | Reference                                                                                                                                               |
| 24.70 – 29.77                                    | 1.79                       | 0.75 (0.56, 0.99)                                                                                                                                                                                        | 0.77 (0.57, 1.02)                                                                | 0.74 (0.55, 0.99)                                                                                                                                       |
| 29.78 – 34.85                                    | 1.97                       | 0.80 (0.60, 1.06)                                                                                                                                                                                        | 0.82 (0.61, 1.09)                                                                | 0.77 (0.58, 1.02)                                                                                                                                       |
| 34.86 – 41.65                                    | 2.10                       | 0.80 (0.60, 1.06)                                                                                                                                                                                        | 0.80 (0.60, 1.23)                                                                | 0.72 (0.54, 0.96)                                                                                                                                       |
| >41.66                                           | 3.14                       | 0.98 (0.74, 1.28)                                                                                                                                                                                        | 0.94 (0.71, 1.23)                                                                | 0.76 (0.57, 1.02)                                                                                                                                       |
| <b>Minimal LA Volume Index, ml/m<sup>2</sup></b> |                            |                                                                                                                                                                                                          |                                                                                  |                                                                                                                                                         |
| <8.96                                            | 1.76                       | Reference                                                                                                                                                                                                | Reference                                                                        | Reference                                                                                                                                               |
| 8.97 – 11.61                                     | 1.59                       | 0.87 (0.64, 1.18)                                                                                                                                                                                        | 0.89 (0.65, 1.21)                                                                | 0.86 (0.63, 1.17)                                                                                                                                       |
| 11.62 – 14.56                                    | 1.87                       | 0.87 (0.65, 1.17)                                                                                                                                                                                        | 0.89 (0.66, 1.19)                                                                | 0.83 (0.62, 1.13)                                                                                                                                       |
| 14.57 – 19.00                                    | 2.53                       | 1.08 (0.81, 1.43)                                                                                                                                                                                        | 1.09 (0.82, 1.45)                                                                | 0.98 (0.74, 1.31)                                                                                                                                       |
| >19.01                                           | 3.46                       | 1.22 (0.93, 1.62)                                                                                                                                                                                        | 1.17 (0.88, 1.55)                                                                | 0.94 (0.70, 1.26)                                                                                                                                       |

<sup>a</sup> Quintile boundaries are based on the primary analysis. Incidence rates are unadjusted.

Abbreviations: ARIC = Atherosclerosis Risk in Communities; LA = left atrial; PY = person-years; APOE = apolipoprotein E

**eTable 13. Hazard Ratios for Incident Dementia Among Participants Without Valvular Heart Disease<sup>a</sup>: The ARIC Study, 2011-2019 (n=3,973)<sup>b</sup>**

|                                        |                            | Hazard Ratio (95% Confidence Interval)                                                                                                                                                                                      |                                                                                     |                                                                                                                                                         |
|----------------------------------------|----------------------------|-----------------------------------------------------------------------------------------------------------------------------------------------------------------------------------------------------------------------------|-------------------------------------------------------------------------------------|---------------------------------------------------------------------------------------------------------------------------------------------------------|
|                                        | Incidence Rate (per 100PY) | Model 1: adjusted for age, sex, race/center, APOE ε4, education, body mass index, smoking status, diabetes, systolic blood pressure, antihypertensive medications, coronary heart disease, heart failure, anticoagulant use | Model 2: adjusted for model 1 plus incident atrial fibrillation and incident stroke | Model 3: adjusted for model 2 plus LAVI <sub>min</sub> (for LA function measures only), left ventricular ejection fraction, left ventricular mass index |
| <b>LA Reservoir Strain, %</b>          |                            |                                                                                                                                                                                                                             |                                                                                     |                                                                                                                                                         |
| ≤26.72                                 | 4.83                       | 2.12 (1.59, 2.81)                                                                                                                                                                                                           | 2.01 (1.51, 2.68)                                                                   | 1.99 (1.42, 2.78)                                                                                                                                       |
| 26.73 – 30.59                          | 2.05                       | 1.00 (0.74, 1.36)                                                                                                                                                                                                           | 0.98 (0.72, 1.33)                                                                   | 0.99 (0.72, 1.36)                                                                                                                                       |
| 30.60 – 34.41                          | 1.73                       | 0.94 (0.69, 1.29)                                                                                                                                                                                                           | 0.93 (0.68, 1.27)                                                                   | 0.95 (0.69, 1.30)                                                                                                                                       |
| 34.42 – 39.40                          | 1.45                       | 0.87 (0.63, 1.20)                                                                                                                                                                                                           | 0.87 (0.63, 1.20)                                                                   | 0.87 (0.63, 1.21)                                                                                                                                       |
| ≥39.41                                 | 1.54                       | Reference                                                                                                                                                                                                                   | Reference                                                                           | Reference                                                                                                                                               |
| <b>LA Conduit Strain, %</b>            |                            |                                                                                                                                                                                                                             |                                                                                     |                                                                                                                                                         |
| <9.90                                  | 3.94                       | 1.80 (1.33, 2.44)                                                                                                                                                                                                           | 1.75 (1.29, 2.37)                                                                   | 1.51 (1.09, 2.08)                                                                                                                                       |
| 9.91 – 13.06                           | 2.51                       | 1.41 (1.03, 1.93)                                                                                                                                                                                                           | 1.35 (0.98, 1.85)                                                                   | 1.25 (0.91, 1.72)                                                                                                                                       |
| 13.07 – 15.89                          | 1.82                       | 1.12 (0.81, 1.55)                                                                                                                                                                                                           | 1.12 (0.80, 1.55)                                                                   | 1.07 (0.77, 1.49)                                                                                                                                       |
| 15.90 – 19.52                          | 1.77                       | 1.17 (0.85, 1.62)                                                                                                                                                                                                           | 1.17 (0.85, 1.62)                                                                   | 1.16 (0.84, 1.60)                                                                                                                                       |
| >19.53                                 | 1.27                       | Reference                                                                                                                                                                                                                   | Reference                                                                           | Reference                                                                                                                                               |
| <b>LA Contractile Strain, %</b>        |                            |                                                                                                                                                                                                                             |                                                                                     |                                                                                                                                                         |
| <13.47                                 | 3.29                       | 1.79 (1.35, 2.36)                                                                                                                                                                                                           | 1.72 (1.30, 2.27)                                                                   | 1.59 (1.16, 2.17)                                                                                                                                       |
| 13.48 – 16.62                          | 2.17                       | 1.18 (0.88, 1.58)                                                                                                                                                                                                           | 1.12 (0.83, 1.49)                                                                   | 1.07 (0.80, 1.45)                                                                                                                                       |
| 16.63 – 19.17                          | 1.88                       | 1.09 (0.81, 1.48)                                                                                                                                                                                                           | 1.09 (0.81, 1.47)                                                                   | 1.05 (0.78, 1.43)                                                                                                                                       |
| 19.18 – 22.37                          | 2.01                       | 1.17 (0.88, 1.57)                                                                                                                                                                                                           | 1.15 (0.86, 1.54)                                                                   | 1.12 (0.83, 1.50)                                                                                                                                       |
| >22.38                                 | 1.77                       | Reference                                                                                                                                                                                                                   | Reference                                                                           | Reference                                                                                                                                               |
| <b>LA Emptying Fraction, %</b>         |                            |                                                                                                                                                                                                                             |                                                                                     |                                                                                                                                                         |
| <50.92                                 | 4.19                       | 1.93 (1.45, 2.56)                                                                                                                                                                                                           | 1.84 (1.38, 2.45)                                                                   | 1.95 (1.36, 2.79)                                                                                                                                       |
| 50.93 – 56.58                          | 2.32                       | 1.23 (0.91, 1.66)                                                                                                                                                                                                           | 1.21 (0.90, 1.64)                                                                   | 1.24 (0.90, 1.72)                                                                                                                                       |
| 56.59 – 61.28                          | 1.82                       | 1.11 (0.81, 1.51)                                                                                                                                                                                                           | 1.10 (0.81, 1.50)                                                                   | 1.12 (0.81, 1.55)                                                                                                                                       |
| 61.29 – 66.17                          | 1.56                       | 1.07 (0.77, 1.47)                                                                                                                                                                                                           | 1.07 (0.77, 1.47)                                                                   | 1.07 (0.77, 1.48)                                                                                                                                       |
| >66.18                                 | 1.46                       | Reference                                                                                                                                                                                                                   | Reference                                                                           | Reference                                                                                                                                               |
| <b>LA Passive Emptying Fraction, %</b> |                            |                                                                                                                                                                                                                             |                                                                                     |                                                                                                                                                         |
| <17.63                                 | 3.64                       | 1.46 (1.10, 1.96)                                                                                                                                                                                                           | 1.43 (1.07, 1.91)                                                                   | 1.27 (0.93, 1.72)                                                                                                                                       |
| 17.64 – 23.66                          | 2.04                       | 1.01 (0.74, 1.38)                                                                                                                                                                                                           | 1.01 (0.74, 1.38)                                                                   | 0.95 (0.69, 1.31)                                                                                                                                       |
| 23.67 – 28.68                          | 2.26                       | 1.20 (0.89, 1.62)                                                                                                                                                                                                           | 1.20 (0.89, 1.62)                                                                   | 1.14 (0.84, 1.55)                                                                                                                                       |
| 28.69 – 35.20                          | 1.72                       | 1.00 (0.73, 1.37)                                                                                                                                                                                                           | 1.01 (0.74, 1.39)                                                                   | 0.99 (0.73, 1.37)                                                                                                                                       |
| ≥35.20                                 | 1.49                       | Reference                                                                                                                                                                                                                   | Reference                                                                           | Reference                                                                                                                                               |
| <b>LA Active Emptying Fraction, %</b>  |                            |                                                                                                                                                                                                                             |                                                                                     |                                                                                                                                                         |
| <35.15                                 | 3.27                       | 1.61 (1.22, 2.13)                                                                                                                                                                                                           | 1.55 (1.17, 2.05)                                                                   | 1.48 (1.07, 2.05)                                                                                                                                       |
| 35.16 – 41.05                          | 2.25                       | 1.26 (0.94, 1.68)                                                                                                                                                                                                           | 1.21 (0.90, 1.62)                                                                   | 1.16 (0.85, 1.58)                                                                                                                                       |

|                                                  | Incidence Rate (per 100PY) | Hazard Ratio (95% Confidence Interval)                                                                                                                                                                                      |                                                                                     |                                                                                                                                                         |
|--------------------------------------------------|----------------------------|-----------------------------------------------------------------------------------------------------------------------------------------------------------------------------------------------------------------------------|-------------------------------------------------------------------------------------|---------------------------------------------------------------------------------------------------------------------------------------------------------|
|                                                  |                            | Model 1: adjusted for age, sex, race/center, APOE ε4, education, body mass index, smoking status, diabetes, systolic blood pressure, antihypertensive medications, coronary heart disease, heart failure, anticoagulant use | Model 2: adjusted for model 1 plus incident atrial fibrillation and incident stroke | Model 3: adjusted for model 2 plus LAVI <sub>min</sub> (for LA function measures only), left ventricular ejection fraction, left ventricular mass index |
| 41.06 – 46.07                                    | 2.14                       | 1.15 (0.86, 1.54)                                                                                                                                                                                                           | 1.14 (0.85, 1.53)                                                                   | 1.09 (0.81, 1.48)                                                                                                                                       |
| 46.09 – 51.88                                    | 1.75                       | 1.01 (0.74, 1.36)                                                                                                                                                                                                           | 1.02 (0.75, 1.38)                                                                   | 1.01 (0.74, 1.37)                                                                                                                                       |
| >51.89                                           | 1.70                       | Reference                                                                                                                                                                                                                   | Reference                                                                           | Reference                                                                                                                                               |
| <b>Maximal LA Volume Index, ml/m<sup>2</sup></b> |                            |                                                                                                                                                                                                                             |                                                                                     |                                                                                                                                                         |
| <24.69                                           | 2.14                       | Reference                                                                                                                                                                                                                   | Reference                                                                           | Reference                                                                                                                                               |
| 24.70 – 29.77                                    | 1.79                       | 0.73 (0.55, 0.98)                                                                                                                                                                                                           | 0.75 (0.56, 0.99)                                                                   | 0.72 (0.54, 0.96)                                                                                                                                       |
| 29.78 – 34.85                                    | 1.94                       | 0.76 (0.57, 1.01)                                                                                                                                                                                                           | 0.78 (0.58, 1.03)                                                                   | 0.73 (0.55, 0.98)                                                                                                                                       |
| 34.86 – 41.65                                    | 2.09                       | 0.77 (0.58, 1.02)                                                                                                                                                                                                           | 0.77 (0.58, 1.02)                                                                   | 0.69 (0.52, 0.92)                                                                                                                                       |
| >41.66                                           | 3.10                       | 0.93 (0.71, 1.23)                                                                                                                                                                                                           | 0.89 (0.68, 1.18)                                                                   | 0.73 (0.55, 0.98)                                                                                                                                       |
| <b>Minimal LA Volume Index, ml/m<sup>2</sup></b> |                            |                                                                                                                                                                                                                             |                                                                                     |                                                                                                                                                         |
| <8.96                                            | 1.77                       | Reference                                                                                                                                                                                                                   | Reference                                                                           | Reference                                                                                                                                               |
| 8.97 – 11.61                                     | 1.58                       | 0.85 (0.62, 1.16)                                                                                                                                                                                                           | 0.87 (0.64, 1.18)                                                                   | 0.84 (0.62, 1.14)                                                                                                                                       |
| 11.62 – 14.56                                    | 1.84                       | 0.83 (0.62, 1.12)                                                                                                                                                                                                           | 0.85 (0.63, 1.14)                                                                   | 0.80 (0.59, 1.08)                                                                                                                                       |
| 14.57 – 19.00                                    | 2.54                       | 1.06 (0.80, 1.41)                                                                                                                                                                                                           | 1.08 (0.81, 1.43)                                                                   | 0.97 (0.73, 1.30)                                                                                                                                       |
| >19.01                                           | 3.44                       | 1.20 (0.90, 1.59)                                                                                                                                                                                                           | 1.13 (0.85, 1.50)                                                                   | 0.93 (0.67, 1.25)                                                                                                                                       |

<sup>a</sup> Participants with moderate to severe valvular heart disease were excluded from this analysis.

<sup>b</sup> Quintile boundaries are based on the primary analysis. Incidence rates are unadjusted.

Abbreviations: ARIC = Atherosclerosis Risk in Communities; LA = left atrial; PY = person-years; APOE = apolipoprotein E

**eTable 14. Competing Risk<sup>a</sup> Subdistribution Hazard Models for Incident Dementia: The ARIC Study, 2011-2019 (n=4,096)<sup>b</sup>**

|                                        |                            | Hazard Ratio (95% Confidence Interval)                                                                                                                                                                                      |                                                                                     |                                                                                                                                                         |
|----------------------------------------|----------------------------|-----------------------------------------------------------------------------------------------------------------------------------------------------------------------------------------------------------------------------|-------------------------------------------------------------------------------------|---------------------------------------------------------------------------------------------------------------------------------------------------------|
|                                        | Incidence Rate (per 100PY) | Model 1: adjusted for age, sex, race/center, APOE ε4, education, body mass index, smoking status, diabetes, systolic blood pressure, antihypertensive medications, coronary heart disease, heart failure, anticoagulant use | Model 2: adjusted for model 1 plus incident atrial fibrillation and incident stroke | Model 3: adjusted for model 2 plus LAVI <sub>min</sub> (for LA function measures only), left ventricular ejection fraction, left ventricular mass index |
| <b>LA Reservoir Strain, %</b>          |                            |                                                                                                                                                                                                                             |                                                                                     |                                                                                                                                                         |
| <26.72                                 | 4.80                       | 1.54 (1.16, 2.05)                                                                                                                                                                                                           | 1.52 (1.14, 2.02)                                                                   | 1.51 (1.07, 2.14)                                                                                                                                       |
| 26.73 – 30.59                          | 2.09                       | 0.99 (0.74, 1.32)                                                                                                                                                                                                           | 0.96 (0.71, 1.28)                                                                   | 0.97 (0.71, 1.31)                                                                                                                                       |
| 30.60 – 34.41                          | 1.72                       | 0.91 (0.67, 1.23)                                                                                                                                                                                                           | 0.90 (0.66, 1.21)                                                                   | 0.91 (0.67, 1.24)                                                                                                                                       |
| 34.42 – 39.40                          | 1.46                       | 0.86 (0.63, 1.18)                                                                                                                                                                                                           | 0.85 (0.62, 1.16)                                                                   | 0.85 (0.62, 1.17)                                                                                                                                       |
| >39.41                                 | 1.55                       | Reference                                                                                                                                                                                                                   | Reference                                                                           | Reference                                                                                                                                               |
| <b>LA Conduit Strain, %</b>            |                            |                                                                                                                                                                                                                             |                                                                                     |                                                                                                                                                         |
| <9.90                                  | 3.94                       | 1.49 (1.10, 2.01)                                                                                                                                                                                                           | 1.47 (1.08, 1.98)                                                                   | 1.32 (0.96, 1.83)                                                                                                                                       |
| 9.91 – 13.06                           | 2.57                       | 1.35 (0.99, 1.82)                                                                                                                                                                                                           | 1.31 (0.97, 1.76)                                                                   | 1.25 (0.92, 1.70)                                                                                                                                       |
| 13.07 – 15.89                          | 1.82                       | 1.05 (0.76, 1.46)                                                                                                                                                                                                           | 1.05 (0.76, 1.45)                                                                   | 1.01 (0.73, 1.40)                                                                                                                                       |
| 15.90 – 19.52                          | 1.77                       | 1.22 (0.89, 1.68)                                                                                                                                                                                                           | 1.22 (0.89, 1.68)                                                                   | 1.20 (0.87, 1.66)                                                                                                                                       |
| >19.53                                 | 1.28                       | Reference                                                                                                                                                                                                                   | Reference                                                                           | Reference                                                                                                                                               |
| <b>LA Contractile Strain, %</b>        |                            |                                                                                                                                                                                                                             |                                                                                     |                                                                                                                                                         |
| <13.47                                 | 3.29                       | 1.43 (1.08, 1.88)                                                                                                                                                                                                           | 1.41 (1.07, 1.87)                                                                   | 1.35 (0.98, 1.86)                                                                                                                                       |
| 13.48 – 16.62                          | 2.14                       | 1.07 (0.79, 1.43)                                                                                                                                                                                                           | 1.04 (0.77, 1.40)                                                                   | 1.03 (0.76, 1.39)                                                                                                                                       |
| 16.63 – 19.17                          | 1.96                       | 1.06 (0.79, 1.41)                                                                                                                                                                                                           | 1.05 (0.79, 1.41)                                                                   | 1.04 (0.78, 1.40)                                                                                                                                       |
| 19.18 – 22.37                          | 2.02                       | 1.16 (0.87, 1.54)                                                                                                                                                                                                           | 1.14 (0.85, 1.52)                                                                   | 1.13 (0.85, 1.51)                                                                                                                                       |
| >22.38                                 | 1.80                       | Reference                                                                                                                                                                                                                   | Reference                                                                           | Reference                                                                                                                                               |
| <b>LA Emptying Fraction, %</b>         |                            |                                                                                                                                                                                                                             |                                                                                     |                                                                                                                                                         |
| <50.92                                 | 4.20                       | 1.60 (1.20, 2.14)                                                                                                                                                                                                           | 1.57 (1.18, 2.10)                                                                   | 1.79 (1.23, 2.62)                                                                                                                                       |
| 50.93 – 56.58                          | 2.32                       | 1.14 (0.85, 1.52)                                                                                                                                                                                                           | 1.12 (0.83, 1.50)                                                                   | 1.20 (0.87, 1.66)                                                                                                                                       |
| 56.59 – 61.28                          | 1.83                       | 1.06 (0.78, 1.45)                                                                                                                                                                                                           | 1.06 (0.78, 1.43)                                                                   | 1.11 (0.81, 1.52)                                                                                                                                       |
| 61.29 – 66.17                          | 1.55                       | 0.99 (0.73, 1.37)                                                                                                                                                                                                           | 0.99 (0.72, 1.35)                                                                   | 1.01 (0.73, 1.39)                                                                                                                                       |
| >66.18                                 | 1.5                        | Reference                                                                                                                                                                                                                   | Reference                                                                           | Reference                                                                                                                                               |
| <b>LA Passive Emptying Fraction, %</b> |                            |                                                                                                                                                                                                                             |                                                                                     |                                                                                                                                                         |
| <17.63                                 | 3.67                       | 1.32 (0.99, 1.77)                                                                                                                                                                                                           | 1.31 (0.98, 1.75)                                                                   | 1.21 (0.89, 1.65)                                                                                                                                       |
| 17.64 – 23.66                          | 2.06                       | 0.97 (0.72, 1.32)                                                                                                                                                                                                           | 0.98 (0.72, 1.32)                                                                   | 0.95 (0.69, 1.29)                                                                                                                                       |
| 23.67 – 28.68                          | 2.27                       | 1.22 (0.91, 1.63)                                                                                                                                                                                                           | 1.22 (0.91, 1.64)                                                                   | 1.19 (0.89, 1.60)                                                                                                                                       |
| 28.69 – 35.20                          | 1.77                       | 0.99 (0.72, 1.35)                                                                                                                                                                                                           | 0.99 (0.73, 1.36)                                                                   | 0.98 (0.72, 1.34)                                                                                                                                       |
| >35.20                                 | 1.49                       | Reference                                                                                                                                                                                                                   | Reference                                                                           | Reference                                                                                                                                               |
| <b>LA Active Emptying Fraction, %</b>  |                            |                                                                                                                                                                                                                             |                                                                                     |                                                                                                                                                         |

|                                                  |      |                   |                   |                   |
|--------------------------------------------------|------|-------------------|-------------------|-------------------|
| <35.15                                           | 3.27 | 1.36 (1.03, 1.79) | 1.34 (1.02, 1.78) | 1.33 (0.96, 1.85) |
| 35.16 – 41.05                                    | 2.28 | 1.15 (0.86, 1.53) | 1.12 (0.84, 1.49) | 1.12 (0.83, 1.52) |
| 41.06 – 46.07                                    | 2.11 | 1.11 (0.84, 1.47) | 1.10 (0.83, 1.46) | 1.10 (0.82, 1.47) |
| 46.09 – 51.88                                    | 1.78 | 0.96 (0.71, 1.30) | 0.97 (0.72, 1.31) | 0.97 (0.72, 1.32) |
| >51.89                                           | 1.74 | Reference         | Reference         | Reference         |
| <b>Maximal LA Volume Index, ml/m<sup>2</sup></b> |      |                   |                   |                   |
| <24.69                                           | 2.12 | Reference         | Reference         | Reference         |
| 24.70 – 29.77                                    | 1.80 | 0.75 (0.56, 0.99) | 0.76 (0.57, 1.02) | 0.74 (0.55, 0.99) |
| 29.78 – 34.85                                    | 1.96 | 0.79 (0.59, 1.05) | 0.81 (0.61, 1.07) | 0.77 (0.58, 1.03) |
| 34.86 – 41.65                                    | 2.07 | 0.78 (0.59, 1.04) | 0.78 (0.59, 1.04) | 0.73 (0.55, 0.98) |
| >41.66                                           | 3.18 | 0.91 (0.68, 1.20) | 0.90 (0.68, 1.19) | 0.77 (0.57, 1.03) |
| <b>Minimal LA Volume Index, ml/m<sup>2</sup></b> |      |                   |                   |                   |
| <8.96                                            | 1.76 | Reference         | Reference         | Reference         |
| 8.97 – 11.61                                     | 1.59 | 0.84 (0.62, 1.15) | 0.86 (0.64, 1.17) | 0.84 (0.62, 1.14) |
| 11.62 – 14.56                                    | 1.86 | 0.86 (0.64, 1.15) | 0.87 (0.65, 1.17) | 0.84 (0.63, 1.13) |
| 14.57 – 19.00                                    | 2.52 | 1.08 (0.82, 1.43) | 1.09 (0.82, 1.44) | 1.02 (0.77, 1.35) |
| >19.01                                           | 3.50 | 1.09 (0.82, 1.44) | 1.07 (0.80, 1.42) | 0.93 (0.69, 1.24) |

<sup>a</sup> Competing risk of death

<sup>b</sup> Quintile boundaries are based on the primary analysis. Incidence rates are unadjusted.

Abbreviations: ARIC = Atherosclerosis Risk in Communities; LA = left atrial; PY = person-years; APOE = apolipoprotein E

**eTable 15. Hazard Ratios for Incident Dementia Among Participants with CRP Measures: the ARIC Study, 2011-2019 (n=4,057)<sup>a</sup>**

|                                        |                            | Hazard Ratio (95% Confidence Interval)                                                                                                                                                                                                          |                                                                                     |                                                                                                                                                         |
|----------------------------------------|----------------------------|-------------------------------------------------------------------------------------------------------------------------------------------------------------------------------------------------------------------------------------------------|-------------------------------------------------------------------------------------|---------------------------------------------------------------------------------------------------------------------------------------------------------|
|                                        | Incidence Rate (per 100PY) | Model 1: adjusted for age, sex, race/center, APOE ε4, education, body mass index, smoking status, diabetes, systolic blood pressure, antihypertensive medications, coronary heart disease, heart failure, anticoagulant use, C-reactive protein | Model 2: adjusted for model 1 plus incident atrial fibrillation and incident stroke | Model 3: adjusted for model 2 plus LAVI <sub>min</sub> (for LA function measures only), left ventricular ejection fraction, left ventricular mass index |
| <b>LA Reservoir Strain, %</b>          |                            |                                                                                                                                                                                                                                                 |                                                                                     |                                                                                                                                                         |
| ≤26.72                                 | 4.74                       | 2.03 (1.53, 2.68)                                                                                                                                                                                                                               | 1.94 (1.46, 2.57)                                                                   | 1.88 (1.35, 2.63)                                                                                                                                       |
| 26.73 – 30.59                          | 2.10                       | 1.01 (0.75, 1.37)                                                                                                                                                                                                                               | 0.99 (0.73, 1.33)                                                                   | 0.99 (0.72, 1.36)                                                                                                                                       |
| 30.60 – 34.41                          | 1.71                       | 0.92 (0.68, 1.26)                                                                                                                                                                                                                               | 0.91 (0.67, 1.24)                                                                   | 0.93 (0.68, 1.27)                                                                                                                                       |
| 34.42 – 39.40                          | 1.45                       | 0.86 (0.62, 1.18)                                                                                                                                                                                                                               | 0.85 (0.62, 1.17)                                                                   | 0.85 (0.62, 1.18)                                                                                                                                       |
| ≥39.41                                 | 1.56                       | Reference                                                                                                                                                                                                                                       | Reference                                                                           | Reference                                                                                                                                               |
| <b>LA Conduit Strain, %</b>            |                            |                                                                                                                                                                                                                                                 |                                                                                     |                                                                                                                                                         |
| <9.90                                  | 3.89                       | 1.76 (1.30, 2.38)                                                                                                                                                                                                                               | 1.71 (1.26, 2.30)                                                                   | 1.45 (1.05, 2.00)                                                                                                                                       |
| 9.91 – 13.06                           | 2.59                       | 1.45 (1.06, 1.96)                                                                                                                                                                                                                               | 1.38 (1.02, 1.88)                                                                   | 1.28 (0.93, 1.75)                                                                                                                                       |
| 13.07 – 15.89                          | 1.78                       | 1.11 (0.80, 1.53)                                                                                                                                                                                                                               | 1.10 (0.79, 1.52)                                                                   | 1.05 (0.76, 1.46)                                                                                                                                       |
| 15.90 – 19.52                          | 1.79                       | 1.19 (0.86, 1.64)                                                                                                                                                                                                                               | 1.19 (0.86, 1.63)                                                                   | 1.17 (0.85, 1.61)                                                                                                                                       |
| >19.53                                 | 1.28                       | Reference                                                                                                                                                                                                                                       | Reference                                                                           | Reference                                                                                                                                               |
| <b>LA Contractile Strain, %</b>        |                            |                                                                                                                                                                                                                                                 |                                                                                     |                                                                                                                                                         |
| <13.47                                 | 3.27                       | 1.74 (1.32, 2.29)                                                                                                                                                                                                                               | 1.69 (1.28, 2.22)                                                                   | 1.55 (1.14, 2.11)                                                                                                                                       |
| 13.48 – 16.62                          | 2.16                       | 1.16 (0.87, 1.54)                                                                                                                                                                                                                               | 1.10 (0.83, 1.47)                                                                   | 1.07 (0.79, 1.43)                                                                                                                                       |
| 16.63 – 19.17                          | 1.98                       | 1.13 (0.84, 1.52)                                                                                                                                                                                                                               | 1.13 (0.85, 1.52)                                                                   | 1.09 (0.81, 1.47)                                                                                                                                       |
| 19.18 – 22.37                          | 1.95                       | 1.12 (0.83, 1.49)                                                                                                                                                                                                                               | 1.09 (0.82, 1.46)                                                                   | 1.07 (0.79, 1.43)                                                                                                                                       |
| >22.38                                 | 1.79                       | Reference                                                                                                                                                                                                                                       | Reference                                                                           | Reference                                                                                                                                               |
| <b>LA Emptying Fraction, %</b>         |                            |                                                                                                                                                                                                                                                 |                                                                                     |                                                                                                                                                         |
| <50.92                                 | 4.18                       | 1.87 (1.41, 2.47)                                                                                                                                                                                                                               | 1.78 (1.34, 2.36)                                                                   | 1.82 (1.27, 2.59)                                                                                                                                       |
| 50.93 – 56.58                          | 2.30                       | 1.18 (0.88, 1.59)                                                                                                                                                                                                                               | 1.17 (0.87, 1.57)                                                                   | 1.18 (0.86, 1.63)                                                                                                                                       |
| 56.59 – 61.28                          | 1.84                       | 1.10 (0.81, 1.50)                                                                                                                                                                                                                               | 1.10 (0.81, 1.49)                                                                   | 1.11 (0.81, 1.52)                                                                                                                                       |
| 61.29 – 66.17                          | 1.54                       | 1.02 (0.74, 1.41)                                                                                                                                                                                                                               | 1.01 (0.74, 1.40)                                                                   | 1.02 (0.74, 1.40)                                                                                                                                       |
| >66.18                                 | 1.48                       | Reference                                                                                                                                                                                                                                       | Reference                                                                           | Reference                                                                                                                                               |
| <b>LA Passive Emptying Fraction, %</b> |                            |                                                                                                                                                                                                                                                 |                                                                                     |                                                                                                                                                         |
| <17.63                                 | 3.66                       | 1.47 (1.10, 1.96)                                                                                                                                                                                                                               | 1.43 (1.08, 1.91)                                                                   | 1.25 (0.92, 1.69)                                                                                                                                       |
| 17.64 – 23.66                          | 2.06                       | 1.03 (0.76, 1.40)                                                                                                                                                                                                                               | 1.03 (0.76, 1.40)                                                                   | 0.96 (0.70, 1.32)                                                                                                                                       |
| 23.67 – 28.68                          | 2.24                       | 1.22 (0.90, 1.64)                                                                                                                                                                                                                               | 1.21 (0.90, 1.63)                                                                   | 1.14 (0.84, 1.54)                                                                                                                                       |
| 28.69 – 35.20                          | 1.76                       | 1.03 (0.75, 1.40)                                                                                                                                                                                                                               | 1.04 (0.76, 1.42)                                                                   | 1.02 (0.75, 1.39)                                                                                                                                       |
| ≥35.20                                 | 1.49                       | Reference                                                                                                                                                                                                                                       | Reference                                                                           | Reference                                                                                                                                               |
| <b>LA Active Emptying Fraction, %</b>  |                            |                                                                                                                                                                                                                                                 |                                                                                     |                                                                                                                                                         |
| <35.15                                 | 3.27                       | 1.58 (1.20, 2.08)                                                                                                                                                                                                                               | 1.52 (1.15, 2.00)                                                                   | 1.42 (1.03, 1.96)                                                                                                                                       |
| 35.16 – 41.05                          | 2.25                       | 1.23 (0.92, 1.65)                                                                                                                                                                                                                               | 1.18 (0.88, 1.58)                                                                   | 1.11 (0.82, 1.51)                                                                                                                                       |

|                                                  |                            | Hazard Ratio (95% Confidence Interval)                                                                                                                                                                                                          |                                                                                     |                                                                                                                                                         |
|--------------------------------------------------|----------------------------|-------------------------------------------------------------------------------------------------------------------------------------------------------------------------------------------------------------------------------------------------|-------------------------------------------------------------------------------------|---------------------------------------------------------------------------------------------------------------------------------------------------------|
|                                                  | Incidence Rate (per 100PY) | Model 1: adjusted for age, sex, race/center, APOE ε4, education, body mass index, smoking status, diabetes, systolic blood pressure, antihypertensive medications, coronary heart disease, heart failure, anticoagulant use, C-reactive protein | Model 2: adjusted for model 1 plus incident atrial fibrillation and incident stroke | Model 3: adjusted for model 2 plus LAVI <sub>min</sub> (for LA function measures only), left ventricular ejection fraction, left ventricular mass index |
| 41.06 – 46.07                                    | 2.12                       | 1.12 (0.84, 1.50)                                                                                                                                                                                                                               | 1.12 (0.84, 1.50)                                                                   | 1.07 (0.79, 1.44)                                                                                                                                       |
| 46.09 – 51.88                                    | 1.79                       | 1.02 (0.75, 1.38)                                                                                                                                                                                                                               | 1.02 (0.76, 1.38)                                                                   | 1.01 (0.75, 1.37)                                                                                                                                       |
| >51.89                                           | 1.71                       | Reference                                                                                                                                                                                                                                       | Reference                                                                           | Reference                                                                                                                                               |
| <b>Maximal LA Volume Index, ml/m<sup>2</sup></b> |                            |                                                                                                                                                                                                                                                 |                                                                                     |                                                                                                                                                         |
| <24.69                                           | 2.10                       | Reference                                                                                                                                                                                                                                       | Reference                                                                           | Reference                                                                                                                                               |
| 24.70 – 29.77                                    | 1.77                       | 0.74 (0.56, 0.99)                                                                                                                                                                                                                               | 0.76 (0.57, 1.02)                                                                   | 0.74 (0.55, 0.99)                                                                                                                                       |
| 29.78 – 34.85                                    | 1.97                       | 0.79 (0.60, 1.05)                                                                                                                                                                                                                               | 0.81 (0.61, 1.08)                                                                   | 0.77 (0.58, 1.02)                                                                                                                                       |
| 34.86 – 41.65                                    | 2.08                       | 0.79 (0.60, 1.05)                                                                                                                                                                                                                               | 0.80 (0.60, 1.06)                                                                   | 0.72 (0.54, 0.96)                                                                                                                                       |
| >41.66                                           | 3.18                       | 0.99 (0.76, 1.30)                                                                                                                                                                                                                               | 0.96 (0.73, 1.26)                                                                   | 0.78 (0.59, 1.04)                                                                                                                                       |
| <b>Minimal LA Volume Index, ml/m<sup>2</sup></b> |                            |                                                                                                                                                                                                                                                 |                                                                                     |                                                                                                                                                         |
| <8.96                                            | 1.74                       | Reference                                                                                                                                                                                                                                       | Reference                                                                           | Reference                                                                                                                                               |
| 8.97 – 11.61                                     | 1.59                       | 0.87 (0.64, 1.18)                                                                                                                                                                                                                               | 0.89 (0.65, 1.21)                                                                   | 0.86 (0.63, 1.17)                                                                                                                                       |
| 11.62 – 14.56                                    | 1.87                       | 0.86 (0.64, 1.16)                                                                                                                                                                                                                               | 0.88 (0.65, 1.18)                                                                   | 0.83 (0.62, 1.12)                                                                                                                                       |
| 14.57 – 19.00                                    | 2.48                       | 1.06 (0.80, 1.40)                                                                                                                                                                                                                               | 1.07 (0.81, 1.42)                                                                   | 0.97 (0.73, 1.29)                                                                                                                                       |
| >19.01                                           | 3.51                       | 1.25 (0.94, 1.65)                                                                                                                                                                                                                               | 1.19 (0.90, 1.58)                                                                   | 0.97 (0.72, 1.30)                                                                                                                                       |

<sup>a</sup> Quintile boundaries are based on the primary analysis. Incidence rates are unadjusted.

Abbreviations: CRP = C-reactive protein; ARIC = Atherosclerosis Risk in Communities; LA = left atrial; PY = person-years; APOE = apolipoprotein E



**eTable 16. Association of Left Atrial Measures with Incident Dementia Using MICE: The ARIC Study, 2011-2019 (n=4,946)<sup>a</sup>**

|                                        |                            | Hazard Ratio (95% Confidence Interval)                                                                                                                                                                                      |                                                                                     |                                                                                                                                                         |
|----------------------------------------|----------------------------|-----------------------------------------------------------------------------------------------------------------------------------------------------------------------------------------------------------------------------|-------------------------------------------------------------------------------------|---------------------------------------------------------------------------------------------------------------------------------------------------------|
|                                        | Incidence Rate (per 100PY) | Model 1: adjusted for age, sex, race/center, APOE ε4, education, body mass index, smoking status, diabetes, systolic blood pressure, antihypertensive medications, coronary heart disease, heart failure, anticoagulant use | Model 2: adjusted for model 1 plus incident atrial fibrillation and incident stroke | Model 3: adjusted for model 2 plus LAVI <sub>min</sub> (for LA function measures only), left ventricular ejection fraction, left ventricular mass index |
| <b>LA Reservoir Strain, %</b>          |                            |                                                                                                                                                                                                                             |                                                                                     |                                                                                                                                                         |
| <26.72                                 | 4.57                       | 1.92 (1.48, 2.47)                                                                                                                                                                                                           | 1.83 (1.42, 2.37)                                                                   | 1.74 (1.28, 2.38)                                                                                                                                       |
| 26.73 – 30.59                          | 2.11                       | 0.99 (0.75, 1.31)                                                                                                                                                                                                           | 0.97 (0.74, 1.28)                                                                   | 0.95 (0.71, 1.28)                                                                                                                                       |
| 30.60 – 34.41                          | 1.69                       | 0.87 (0.65, 1.16)                                                                                                                                                                                                           | 0.86 (0.64, 1.14)                                                                   | 0.86 (0.64, 1.16)                                                                                                                                       |
| 34.42 – 39.40                          | 1.54                       | 0.87 (0.65, 1.18)                                                                                                                                                                                                           | 0.87 (0.65, 1.17)                                                                   | 0.87 (0.64, 1.17)                                                                                                                                       |
| >39.41                                 | 1.62                       | Reference                                                                                                                                                                                                                   | Reference                                                                           | Reference                                                                                                                                               |
| <b>LA Conduit Strain, %</b>            |                            |                                                                                                                                                                                                                             |                                                                                     |                                                                                                                                                         |
| <9.90                                  | 3.72                       | 1.67 (1.27, 2.18)                                                                                                                                                                                                           | 1.60 (1.21, 2.10)                                                                   | 1.35 (1.01, 1.81)                                                                                                                                       |
| 9.91 – 13.06                           | 2.62                       | 1.40 (1.06, 1.86)                                                                                                                                                                                                           | 1.36 (1.03, 1.80)                                                                   | 1.25 (0.93, 1.66)                                                                                                                                       |
| 13.07 – 15.89                          | 1.81                       | 1.04 (0.77, 1.40)                                                                                                                                                                                                           | 1.04 (0.77, 1.39)                                                                   | 0.99 (0.73, 1.33)                                                                                                                                       |
| 15.90 – 19.52                          | 1.81                       | 1.15 (0.86, 1.54)                                                                                                                                                                                                           | 1.15 (0.86, 1.54)                                                                   | 1.12 (0.84, 1.50)                                                                                                                                       |
| >19.53                                 | 1.36                       | Reference                                                                                                                                                                                                                   | Reference                                                                           | Reference                                                                                                                                               |
| <b>LA Contractile Strain, %</b>        |                            |                                                                                                                                                                                                                             |                                                                                     |                                                                                                                                                         |
| <13.47                                 | 3.15                       | 1.65 (1.29, 2.13)                                                                                                                                                                                                           | 1.61 (1.25, 2.08)                                                                   | 1.46 (1.10, 1.93)                                                                                                                                       |
| 13.48 – 16.62                          | 2.30                       | 1.21 (0.94, 1.57)                                                                                                                                                                                                           | 1.17 (0.90, 1.51)                                                                   | 1.12 (0.86, 1.46)                                                                                                                                       |
| 16.63 – 19.17                          | 1.90                       | 1.07 (0.81, 1.41)                                                                                                                                                                                                           | 1.08 (0.82, 1.42)                                                                   | 1.03 (0.78, 1.37)                                                                                                                                       |
| 19.18 – 22.37                          | 2.04                       | 1.16 (0.89, 1.51)                                                                                                                                                                                                           | 1.14 (0.88, 1.49)                                                                   | 1.11 (0.85, 1.45)                                                                                                                                       |
| >22.38                                 | 1.83                       | Reference                                                                                                                                                                                                                   | Reference                                                                           | Reference                                                                                                                                               |
| <b>LA Emptying Fraction, %</b>         |                            |                                                                                                                                                                                                                             |                                                                                     |                                                                                                                                                         |
| <50.92                                 | 4.00                       | 1.76 (1.34, 2.32)                                                                                                                                                                                                           | 1.68 (1.27, 2.21)                                                                   | 1.63 (1.15, 2.31)                                                                                                                                       |
| 50.93 – 56.58                          | 2.30                       | 1.16 (0.86, 1.55)                                                                                                                                                                                                           | 1.14 (0.85, 1.53)                                                                   | 1.12 (0.80, 1.56)                                                                                                                                       |
| 56.59 – 61.28                          | 1.87                       | 1.06 (0.78, 1.44)                                                                                                                                                                                                           | 1.04 (0.77, 1.42)                                                                   | 1.03 (0.75, 1.42)                                                                                                                                       |
| 61.29 – 66.17                          | 1.60                       | 1.01 (0.73, 1.38)                                                                                                                                                                                                           | 0.99 (0.73, 1.36)                                                                   | 0.99 (0.72, 1.36)                                                                                                                                       |
| >66.18                                 | 1.57                       | Reference                                                                                                                                                                                                                   | Reference                                                                           | Reference                                                                                                                                               |
| <b>LA Passive Emptying Fraction, %</b> |                            |                                                                                                                                                                                                                             |                                                                                     |                                                                                                                                                         |
| <17.63                                 | 3.49                       | 1.45 (1.09, 1.93)                                                                                                                                                                                                           | 1.40 (1.05, 1.87)                                                                   | 1.22 (0.90, 1.67)                                                                                                                                       |
| 17.64 – 23.66                          | 2.17                       | 1.07 (0.79, 1.46)                                                                                                                                                                                                           | 1.07 (0.79, 1.45)                                                                   | 0.99 (0.72, 1.36)                                                                                                                                       |
| 23.67 – 28.68                          | 2.23                       | 1.18 (0.87, 1.59)                                                                                                                                                                                                           | 1.16 (0.86, 1.57)                                                                   | 1.10 (0.81, 1.49)                                                                                                                                       |
| 28.69 – 35.20                          | 1.81                       | 1.03 (0.76, 1.39)                                                                                                                                                                                                           | 1.04 (0.77, 1.40)                                                                   | 1.01 (0.75, 1.37)                                                                                                                                       |
| >35.20                                 | 1.56                       | Reference                                                                                                                                                                                                                   | Reference                                                                           | Reference                                                                                                                                               |
| <b>LA Active Emptying Fraction, %</b>  |                            |                                                                                                                                                                                                                             |                                                                                     |                                                                                                                                                         |

|                                                  |                            | Hazard Ratio (95% Confidence Interval)                                                                                                                                                                                      |                                                                                     |                                                                                                                                                         |
|--------------------------------------------------|----------------------------|-----------------------------------------------------------------------------------------------------------------------------------------------------------------------------------------------------------------------------|-------------------------------------------------------------------------------------|---------------------------------------------------------------------------------------------------------------------------------------------------------|
|                                                  | Incidence Rate (per 100PY) | Model 1: adjusted for age, sex, race/center, APOE ε4, education, body mass index, smoking status, diabetes, systolic blood pressure, antihypertensive medications, coronary heart disease, heart failure, anticoagulant use | Model 2: adjusted for model 1 plus incident atrial fibrillation and incident stroke | Model 3: adjusted for model 2 plus LAVI <sub>min</sub> (for LA function measures only), left ventricular ejection fraction, left ventricular mass index |
| ≤35.15                                           | 3.19                       | 1.50 (1.14, 1.97)                                                                                                                                                                                                           | 1.45 (1.10, 1.91)                                                                   | 1.31 (0.95, 1.80)                                                                                                                                       |
| 35.16 – 41.05                                    | 2.32                       | 1.24 (0.94, 1.64)                                                                                                                                                                                                           | 1.19 (0.90, 1.58)                                                                   | 1.11 (0.82, 1.49)                                                                                                                                       |
| 41.06 – 46.07                                    | 2.08                       | 1.07 (0.81, 1.42)                                                                                                                                                                                                           | 1.06 (0.80, 1.40)                                                                   | 1.00 (0.75, 1.33)                                                                                                                                       |
| 46.09 – 51.88                                    | 1.82                       | 1.01 (0.74, 1.37)                                                                                                                                                                                                           | 1.01 (0.74, 1.37)                                                                   | 0.98 (0.72, 1.35)                                                                                                                                       |
| ≥51.89                                           | 1.77                       | Reference                                                                                                                                                                                                                   | Reference                                                                           | Reference                                                                                                                                               |
| <b>Maximal LA Volume Index, ml/m<sup>2</sup></b> |                            |                                                                                                                                                                                                                             |                                                                                     |                                                                                                                                                         |
| ≤24.69                                           | 2.05                       | Reference                                                                                                                                                                                                                   | Reference                                                                           | Reference                                                                                                                                               |
| 24.70 – 29.77                                    | 1.84                       | 0.81 (0.61, 1.07)                                                                                                                                                                                                           | 0.83 (0.63, 1.10)                                                                   | 0.81 (0.61, 1.06)                                                                                                                                       |
| 29.78 – 34.85                                    | 2.00                       | 0.86 (0.64, 1.14)                                                                                                                                                                                                           | 0.88 (0.66, 1.17)                                                                   | 0.83 (0.63, 1.11)                                                                                                                                       |
| 34.86 – 41.65                                    | 2.12                       | 0.86 (0.66, 1.13)                                                                                                                                                                                                           | 0.87 (0.67, 1.13)                                                                   | 0.80 (0.61, 1.04)                                                                                                                                       |
| ≥41.66                                           | 3.14                       | 1.07 (0.83, 1.39)                                                                                                                                                                                                           | 1.04 (0.80, 1.35)                                                                   | 0.89 (0.68, 1.17)                                                                                                                                       |
| <b>Minimal LA Volume Index, ml/m<sup>2</sup></b> |                            |                                                                                                                                                                                                                             |                                                                                     |                                                                                                                                                         |
| ≤8.96                                            | 1.77                       | Reference                                                                                                                                                                                                                   | Reference                                                                           | Reference                                                                                                                                               |
| 8.97 – 11.61                                     | 1.63                       | 0.89 (0.64, 1.22)                                                                                                                                                                                                           | 0.90 (0.68, 1.23)                                                                   | 0.87 (0.63, 1.19)                                                                                                                                       |
| 11.62 – 14.56                                    | 1.88                       | 0.90 (0.67, 1.20)                                                                                                                                                                                                           | 0.91 (0.68, 1.22)                                                                   | 0.87 (0.65, 1.16)                                                                                                                                       |
| 14.57 – 19.00                                    | 2.47                       | 1.10 (0.83, 1.45)                                                                                                                                                                                                           | 1.11 (0.86, 1.46)                                                                   | 1.01 (0.76, 1.34)                                                                                                                                       |
| >19.01                                           | 3.42                       | 1.29 (0.99, 1.67)                                                                                                                                                                                                           | 1.23 (0.94, 1.60)                                                                   | 1.04 (0.79, 1.38)                                                                                                                                       |

<sup>a</sup> Quintile boundaries are based on the primary analysis. LA measures were imputed for 850 participants. Incidence rates are unadjusted.

Abbreviations: ARIC = Atherosclerosis Risk in Communities; MICE = multiple imputation by chain equations; LA = left atrial; PY = person-years; APOE = apolipoprotein E

## eFigure 1. Directed Acyclic Graph

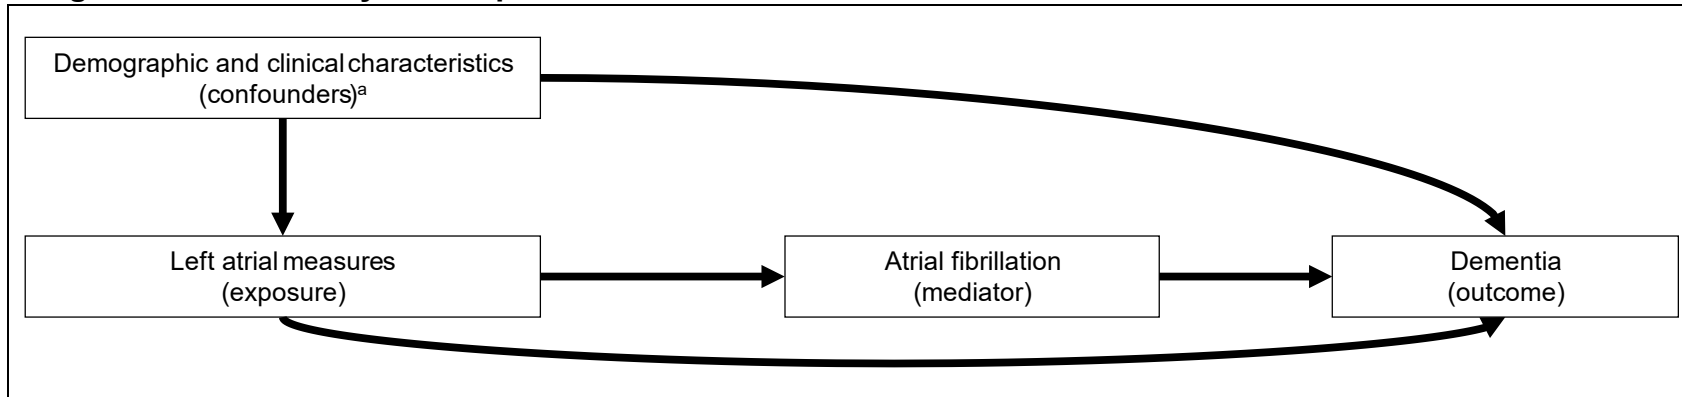

eFigure 1 illustrates the hypothesized associations among left atrial (LA) measures, dementia, atrial fibrillation (AF), and confounders. Specifically, in addition to AF mediating part of the association between LA measures and dementia, LA measures are also associated with dementia via a pathway that is independent of AF.

<sup>a</sup> Confounders include age, sex, race/center, education, body mass index, smoking status, diabetes, systolic blood pressure, antihypertensive medications, coronary heart disease, heart failure

**eFigure 2. Association of Left Atrial Measures with Incident Dementia: The ARIC Study, 2011-2019 (n=4,096)**

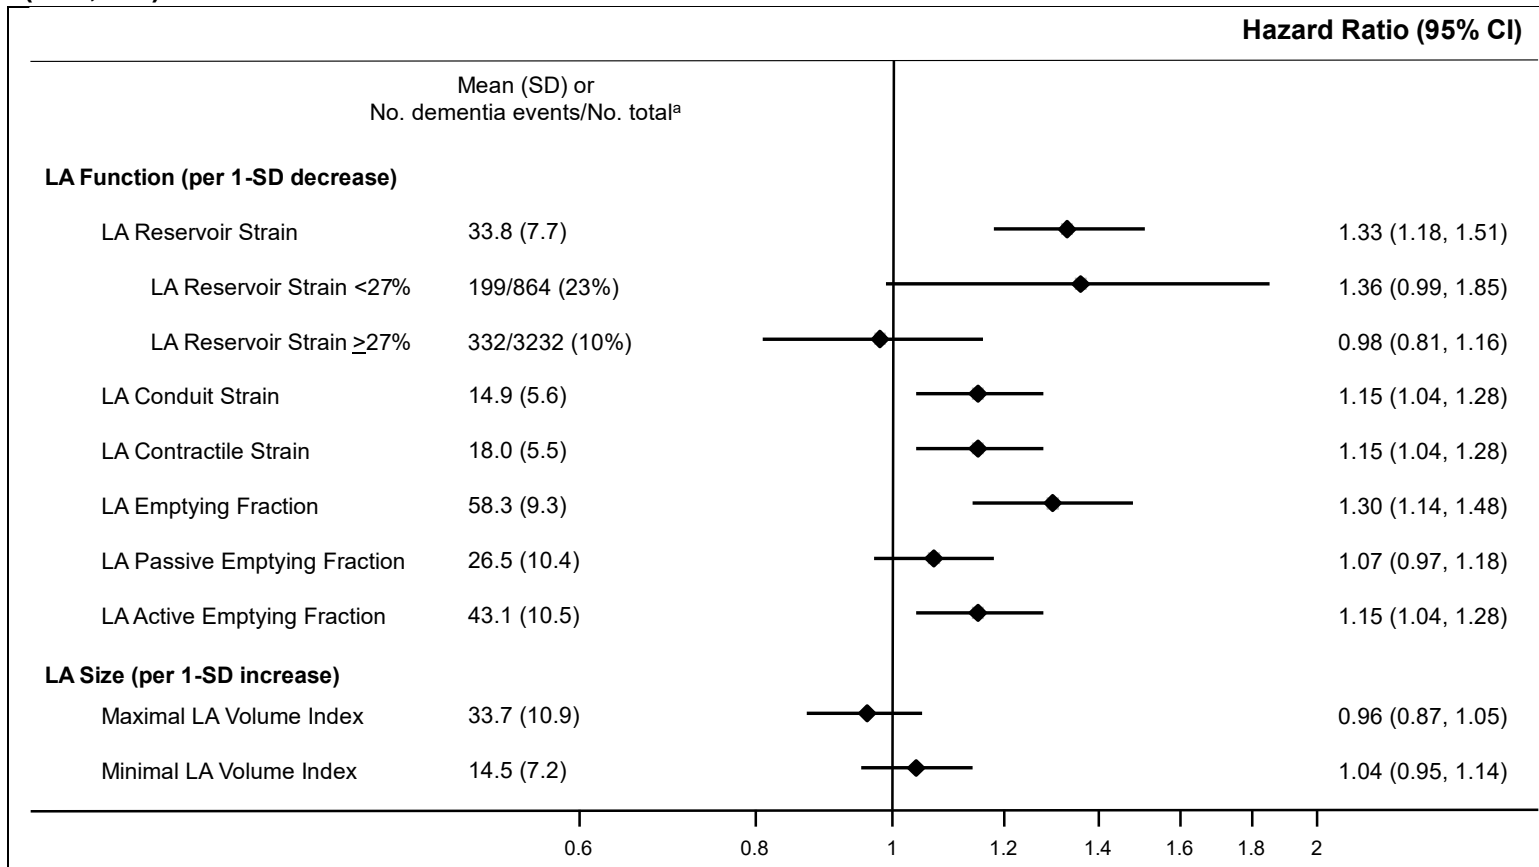

eFigure 2 depicts the association of left atrial measures (per 1-SD decrease or increase) and incident dementia. For continuous LA measures, hazard ratios are per 1-SD decrease or increase in LA measure. For example, each 1-SD decrease in LA conduit strain was associated with an increased risk of dementia (hazard ratio (95% CI): 1.15 (1.04, 1.28)).

Adjusted for age, sex, race/center, APOE ε4, education, body mass index, smoking status, diabetes, systolic blood pressure, antihypertensive medications, coronary heart disease, heart failure, anticoagulant use, incident stroke, incident atrial fibrillation, LAVI<sub>min</sub> (for LA function measures only), left ventricular ejection fraction, left ventricular mass index

<sup>a</sup> Data presented as mean (SD) for continuous variables and number of dementia events/total (%) for categorical variables. Units for LA function measures are %; units for LA size measures are ml/m<sup>2</sup>.

Abbreviations: ARIC = Atherosclerosis Risk in Communities; LA = left atrial; SD = standard deviation; CI = confidence interval

**eFigure 3. Restricted Cubic Splines Plotting Dementia Incidence by Left Atrial Measures: The ARIC Study, 2011-2019 (n=4,096)**

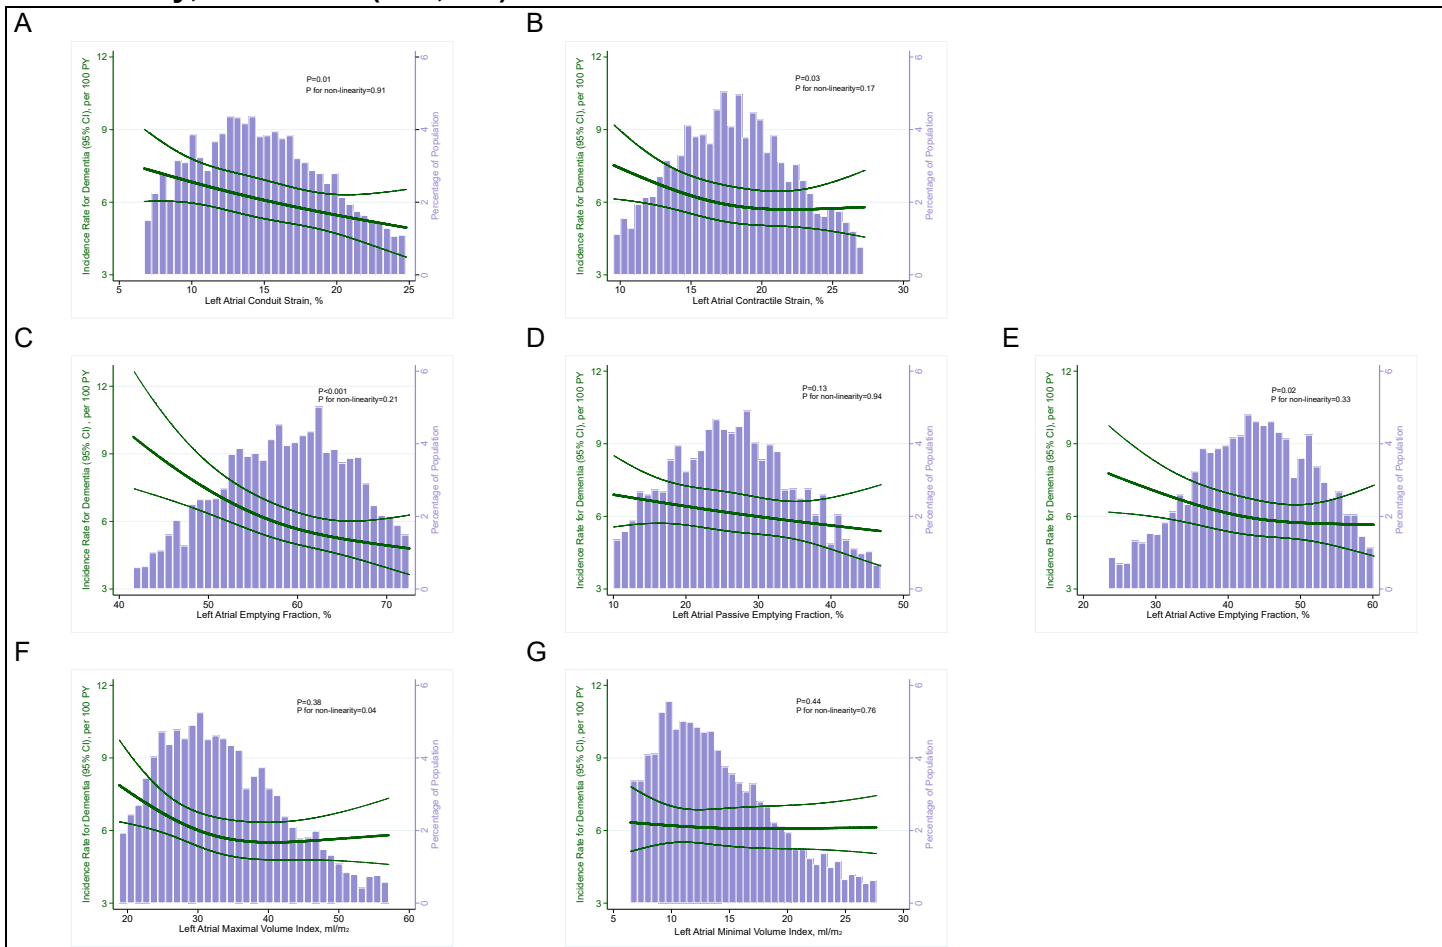

eFigure 3 depicts the association between LA measures and dementia incidence. *P* values are shown to indicate whether associations are significant and whether they are non-linear.

A: LA conduit strain; B: LA contractile strain; C: LA emptying fraction; D: LA passive emptying fraction; E: LA active emptying fraction; F: LA maximal volume index; G: LA minimal volume index

Adjusted for age, sex, race/center, APOE ε4, education, body mass index, smoking status, diabetes, systolic blood pressure, antihypertensive medications, coronary heart disease, heart failure, anticoagulant use, incident atrial fibrillation, incident stroke, LAVI<sub>min</sub> (for LA function measures), left ventricular ejection fraction, left ventricular mass index

Abbreviations: ARIC = Atherosclerosis Risk in Communities; LA = left atrial; PY = person-years
